# Supplementary material
Source: MDPI journal article supplement (https://www.mdpi.com/1424-2818/14/5/412)
Supplement: s1 [file s1]

Archive with 2 entries (2 files):
- Supplementary_Figures_Villsenetal.pdf
- Tables S1-S4.xlsx
