# Supplementary material
Source: MDPI journal article supplement (https://www.mdpi.com/1424-2818/14/5/412)
Supplement: s1 [file s1 › Supplementary_Figures_Villsenetal.pdf]

# Metabarcoding approach reveals extensive dietary overlap between two benthic stream fishes (*Zingel asper* and *Cottus gobio*) and provides insights into their coexistence

Kurt Villsen<sup>1\*</sup>, Emmanuel Corse<sup>1,2,3</sup>, Gaït Archambaud-Suard<sup>4</sup>, Kévin Héran<sup>1</sup>, Emese Megléc<sup>1</sup>, Alexander V. Ereskovsky<sup>1</sup>, Rémi Chappaz<sup>4</sup>, Vincent Dubut<sup>1</sup>

<sup>1</sup> Aix Marseille Université, CNRS, IRD, Avignon Université, IMBE, Marseille, France

<sup>2</sup> Centre Universitaire de Mayotte, Dembeni, Mayotte, France

<sup>3</sup> MARBEC, Univ Montpellier, CNRS, Ifremer, IRD, Montpellier, France

<sup>4</sup> INRAE, Aix Marseille Université, RECOVER, Aix-en-Provence, France

\* Correspondence: kurt.villsen1@gmail.com

## SUPPLEMENTARY FIGURES

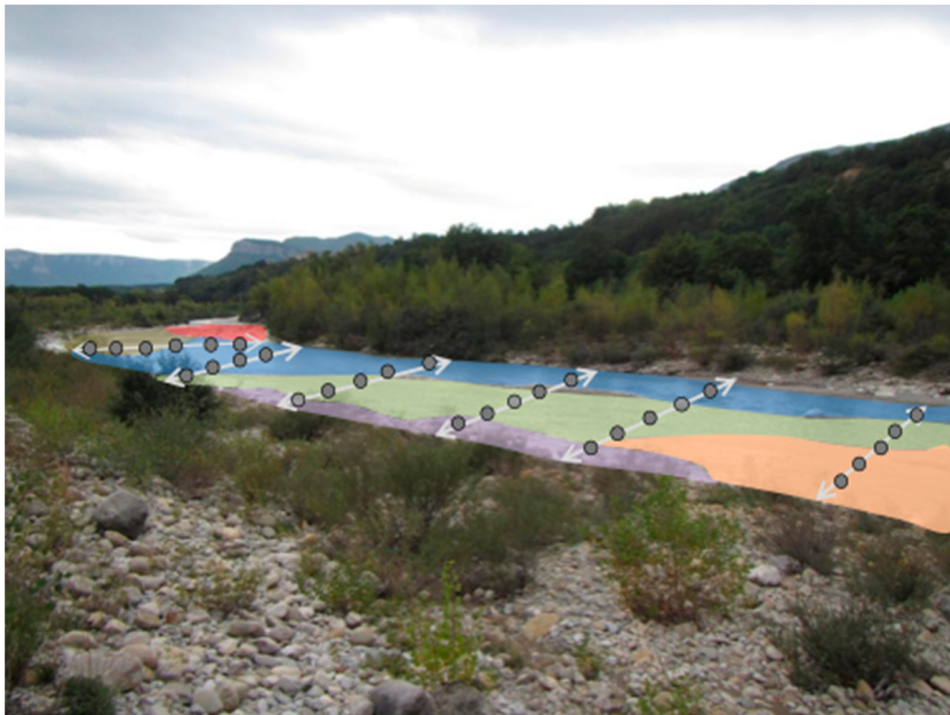

**Figure S1.** Macroinvertebrate sampling methodology. One to five Surber samples were taken per transect with the intention of sampling all representative habitat types (represented by colouration in the figure) in each respective transect.
