# Supplementary material
Source: MDPI journal article supplement (https://www.mdpi.com/1424-2818/14/5/412)
Supplement: s1 [file s1 › Tables S1-S4.xlsx]

## Sheet: ST1-macroinvertebrate community
Table S1. Summary of macroinvertebrate sampling
						HEN		SSL		SLS
Order	Family	Genus	Species	Grouping for analyses	Figure grouping	Relative Abundance (%)	Density (inv/m²)	Relative Abundance (%)	Density (inv/m²)	Relative Abundance (%)	Density (inv/m²)
Diptera	Athericidae			Athericidae	Other_Diptera	0.0182216	0.666667	0	0	0	0
Diptera	Blephariceridae			Blephariceridae	Other_Diptera	0	0	0.0221951	0.666667	0	0
Diptera	Ceratopogonidae			Ceratopogonidae	Other_Diptera	0.15792	5.77778	0.221951	6.66667	0.0128353	0.666667
Diptera	Chironomidae			Chironomidae	Chironomidae	0.491983	18	1.60914	48.3333	2.23335	116
Diptera	Chironomidae			Orthocladiinae	Orthocladiinae	15.5916	570.444	11.4083	342.667	27.2366	1414.67
Diptera	Empididae			Empididae	Other_Diptera	0.121477	4.44444	0.210853	6.33333	0.821461	42.6667
Diptera	Limoniidae			Limoniidae	Other_Diptera	0.279397	10.2222	0.277439	8.33333	0.1091	5.66667
Diptera	Simuliidae			Simuliidae	Simuliidae	5.30248	194	26.3678	792	11.3657	590.333
Diptera	Tabanidae			Tabanidae	Other_Diptera	0.042517	1.55556	0.155366	4.66667	0.00641766	0.333333
Diptera	Tipulidae			Tipulidae	Other_Diptera	0.0121477	0.444444	0	0	0.00641766	0.333333
Ephemeroptera	Baetidae	Alainites	Alainites_muticus	Alainites_muticus	Other_Baetidae	0.0485909	1.77778	0.0332926	1	0.635348	33
Ephemeroptera	Baetidae	Baetis		Baetis	Baetis	15.0207	549.556	13.9829	420	13.445	698.333
Ephemeroptera	Baetidae	Procloeon		Procloeon	Other_Baetidae	0	0	0	0	0.0320883	1.66667
Ephemeroptera	Caenidae	Caenis		Caenis	Caenis	20.3596	744.889	8.48962	255	2.68258	139.333
Ephemeroptera	Ephemerellidae			Ephemerellidae	Other_Ephemeroptera	0.00607386	0.222222	0	0	0.0513413	2.66667
Ephemeroptera	Ephemeridae	Ephemera		Ephemera	Other_Ephemeroptera	0.00607386	0.222222	0	0	0	0
Ephemeroptera	Heptageniidae	Epeorus		Epeorus	Heptageniidae	0	0	0	0	0.0128353	0.666667
Ephemeroptera	Heptageniidae			Heptageniidae	Heptageniidae	3.63217	132.889	5.62646	169	1.68143	87.3333
Ephemeroptera	Heptageniidae	Rhithrogena		Rhithrogena	Heptageniidae	0.0607386	2.22222	0.488292	14.6667	0.115518	6
Ephemeroptera	Leptophlebiidae			Leptophlebiidae	Other_Ephemeroptera	0	0	0	0	0.0128353	0.666667
Ephemeroptera	Oligoneuriellidae	Oligoneuriella		Oligoneuriella	Other_Ephemeroptera	0	0	0	0	0.00641766	0.333333
Ephemeroptera	Polymitarcyidae			Polymitarcyidae	Other_Ephemeroptera	0	0	0	0	0.00641766	0.333333
Ephemeroptera	Potamanthidae	Potamanthus		Potamanthus	Other_Ephemeroptera	0.680272	24.8889	0.432804	13	0.00641766	0.333333
Plecoptera	Capniidae			Capniidae	Plecoptera	0.0182216	0.666667	0	0	0	0
Plecoptera	Chloroperlidae			Chloroperlidae	Plecoptera	0.983965	36	0.266341	8	0.00641766	0.333333
Plecoptera	Leuctridae			Leuctridae	Plecoptera	0	0	3.1739	95.3333	6.47542	336.333
Plecoptera	Perlidae	Dinocras		Dinocras	Plecoptera	0	0	0.0776828	2.33333	0.0256706	1.33333
Plecoptera	Perlidae	Perla		Perla	Plecoptera	0.813897	29.7778	0.0443902	1.33333	0	0
Plecoptera	Perlodidae			Perlodidae	Plecoptera	0.15792	5.77778	0.0554877	1.66667	0	0
Trichoptera	Hydropsychidae			Cheumatopsyche	Other_Trichoptera	6.29859	230.444	0.277439	8.33333	0.00641766	0.333333
Trichoptera	Hydropsychidae	Hydropsyche		Hydropsyche	Hydropsyche	8.21186	300.444	12.4514	374	1.89321	98.3333
Trichoptera	Hydroptilidae			Hydroptilidae	Other_Trichoptera	0.498056	18.2222	2.07524	62.3333	1.6365	85
Trichoptera	Leptoceridae			Leptoceridae	Other_Trichoptera	0	0	0.0665853	2	0	0
Trichoptera	Limnephilidae			Limnephilidae	Other_Trichoptera	0.00607386	0.222222	0	0	0	0
Trichoptera	Polycentropodidae			Polycentropodidae	Other_Trichoptera	0	0	0	0	0.0128353	0.666667
Trichoptera	Psychomyiidae			Psychomyiidae	Other_Trichoptera	0.279397	10.2222	1.05427	31.6667	0.205365	10.6667
Trichoptera	Rhyacophilidae			Rhyacophilidae	Other_Trichoptera	1.30588	47.7778	0.832316	25	1.14876	59.6667
Trichoptera				Trichoptera	Other_Trichoptera	0.00607386	0.222222	0	0	0	0
Coleoptera	Dryopidae			Dryopidae	Coleoptera	0.085034	3.11111	0.0776828	2.33333	0.0128353	0.666667
Coleoptera	Elmidae	Elmis		Elmis	Coleoptera	4.43392	162.222	3.21829	96.6667	0.0641766	3.33333
Coleoptera	Elmidae	Esolus		Esolus	Coleoptera	0.212585	7.77778	0.221951	6.66667	0.372224	19.3333
Coleoptera	Elmidae	Limnius		Limnius	Coleoptera	1.45773	53.3333	1.45378	43.6667	0.0320883	1.66667
Coleoptera	Elmidae	Oulimnius		Oulimnius	Coleoptera	0.00607386	0.222222	0	0	0	0
Coleoptera	Elmidae	Riolus		Riolus	Coleoptera	0.0242954	0.888889	0	0	0	0
Coleoptera	Gyrinidae			Gyrinidae	Coleoptera	0.182216	6.66667	0.554877	16.6667	0.0128353	0.666667
Coleoptera				Coleoptera	Coleoptera	0	0	0	0	0.019253	1
Hemiptera	Hemiptera			Hemiptera	Hemiptera	0	0	0.0221951	0.666667	0.0705943	3.66667
Odonata				Odonata	Rare_prey	0.0789602	2.88889	0.0887804	2.66667	0.0320883	1.66667
Crustacea	Gammaridae			Gammaridae	Gammaridae	5.79446	212	1.57585	47.3333	24.3743	1266
Hydracarina				Hydracarina	Hydracarina	1.3241	48.4444	1.85329	55.6667	1.37338	71.3333
Oligochaeta	Lumbricidae			Lumbricidae	Oligochaeta	0.0485909	1.77778	0.0221951	0.666667	0	0
Oligochaeta	Naididae			Naididae	Oligochaeta	0.297619	10.8889	0	0	0.154024	8
Oligochaeta				Oligochaeta	Oligochaeta	5.35107	195.778	0.898901	27	1.3092	68
Mollusca	Ancylidae			Ancylidae	Rare_prey	0	0	0.155366	4.66667	0.179695	9.33333
Mollusca	Hydrobiidae			Hydrobiidae	Rare_prey	0.224733	8.22222	0.0998779	3	0.0128353	0.666667
Planaires	Planaires			Planaires	Rare_prey	0.0242954	0.888889	0.0443902	1.33333	0.0898473	4.66667
Nematoda				Nematodes	Rare_prey	0.0303693	1.11111	0	0	0	0
Nematomorphes	Gordiidae			Gordius	Rare_prey	0.0121477	0.444444	0.0110975	0.333333	0	0

## Sheet: ST2- Metabarcoding data
Table S2. Complete list of validated ASVs/contigs for Z. asper and C. gobio faeces samples and mock samples
							HEN																											HEN
ASV/contig	Sequence	Taxonomic assignment		Primer set coverage			Cottus gobio																											Zingel asper
		Final Taxonomic Assignment	Taxonomic level	LFCR	MFZR	ZFZR	15HenBCg01	15HenBCg02	15HenBCg03	15HenBCg04	15HenBCg05	15HenBCg06	15HenBCg07	15HenBCg08	15HenBCg09	15HenBCg12	15HenBCg13	15HenBCg14	15HenBCg15	15HenBCg16	15HenBCg17	15HenBCg18	15HenBCg19	15HenBCg20	15HenBCg21	15HenBCg22	15HenBCg23	15HenBCg24	15HenBCg25	15HenBCg26	15HenBCg27	15HenBCg28	15HenBCg30	15HenB0001	15HenB0002	15HenB0003	15HenB0004	15HenB0005	15HenB0006	15HenB0011	15HenB0017	15HenB0018	15HenB0019	15HenB0020	15HenB0021	15HenB0022	15HenB0023	15HenB0024	15HenB0025
contig_0007	TACTTTATATTTCATTTTTGGTGCATGATCAGGTATGGTGGGTACTTCCCTTAGTTTATTAATTCGAGCAGAACTTGGTAATCCTGGTTCTTTGATTGGTGATGACCAGATTTATAATGTTATTGTCACTGCCCATGCTTTTATTATGATTTTTTTTATAGTGATACCTATTATAATT	Baetis_fuscatus	species	1	1	1																																				1
contig_0008	TACTTTATATTTCATTTTTGGTGCATGATCAGGTATGGTGGGTACTTCCCTTAGTTTATTAATTCGAGCAGAACTTGGTAATCCTGGTTCTTTGATTGGTGATGATCAGATTTATAACGTTATTGTCACTGCCCATGCTTTTATTATGATTTTTTTTATAGTGATACCTATTATAATT	Baetis_fuscatus	species	1	1	1									1									1		1							1	1		1				1	1				1				1
contig_0015	TACTTTATATTTCATTTTTGGTGCATGATCAGGTATGGTGGGTACTTCCCTTAGTTTATTAATTCGAGCAGAACTTGGTAATCCTGGTTCTTTGATTGGCGATGATCAGATTTATAACGTTATTGTCACTGCCCATGCTTTTATTATGATTTTTTTTATAGTGATACCTATTATAATT	Baetis_fuscatus	species	1	1	1																	1																			1
contig_0018	AACTTTATATTTTATTTTTGGAATTTGAGCAAGATTAATTGGTACATCATTAAGAATAATCATTCGAATTGAATTAAGAACTCCTGGATCATTTATAGGAAATGATCAAATCTATAATTCGATTGTCACTATCCATGCTTTTATTATAATTTTTTTTATAGTTATACCTATTATAATT	Psychomyia_pusilla	species	1	1	1
contig_0019	AACCCTATATTTTATTTTTGGAGCCTGATCTGGTATAGTTGGAACTTCTTTAAGTCTCTTAATTCGTGCTGAGTTAGGCCAGCCAGGATCCCTAATTGGTGATGACCAAATTTATAATGTAATTGTAACCGCCCATGCTTTCATTATAATTTTCTTTATAGTAATACCTATTATAATT	Ephemerella_ignita	species	1	1	1																					1
contig_0022	TACTTTATACTTTATATTTGGAATTTGAGCAGGTTTAATTGGATCTTCTATAAGATTTATTATTCGTATAGAATTAAGAACCCCTGGTAGATTTATTGGAAATGATCAAATTTATAATGTTATTGTTACATCTCATGCATTTATTATAATTTTTTTTATAGTAATACCAATTATAATT	Hydropsyche_exocellata	species	1	1	1
contig_0026	TACTCTATATTTCATTTTTGGTGCTTGGGCAGGTATGGTAGGGACCTCATTAAGACTTTTAATTCGAGCCGAGTTGGGTAACCCGGGTTCATTAATTGGGGACGATCAAATTTATAACGTAATCGTAACTGCTCATGCCTTTATTATGATTTTTTTTATAGTGATACCTATTATAATT	Baetis_rhodani	species	1	1	1																																		1		1	1
contig_0027	CACTCTTTATTTTATATTTGGAATCTGATCAGGCTTAGTAGGATCATCTTTAAGTTTTATTATTCGAATAGAATTAAGAACTCCTGGAAGATTTATTGGAAATGACCAAATTTATAATGTTGTAGTAACTTCTCATGCTTTTATCATAATTTTTTTTATAGTAATGCCTATTATAATC	Hydropsyche_instabilis	species	1	1	1										1												1								1
contig_0030	TACTTTATATTTCATTTTTGGTGCATGATCAGGTATGGTGGGTACTTCCCTTAGTTTATTAATTCGAGCAGAACTTGGTAATCCTGGTTCTTTGATTGGTGATGATCAGATTTATAATGTTATTGTCACTGCCCATGCTTTTATTATGATTTTTTTTATAGTGATACCTATTATAATT	Baetis_fuscatus	species	1	1	1
contig_0034	TACTTTATATTTCATTTTTGGTGCGTGATCAGGTATGGTGGGTACTTCCCTTAGTTTATTAATTCGAGCAGAACTTGGTAATCCTGGTTCTTTGATTGGCGATGATCAGATTTATAACGTTATTGTCACTGCCCATGCTTTTATTATGATTTTTTTTATAGTGATACCTATTATAATT	Baetis_fuscatus	species	1	1	1
contig_0038	TACTTTATACTTTATCTTAGGAGCTTGGGCTAGTGTTGTTGGCACTTCCATGAGAGTAATTATTCGCTCAGAACTAAGTACACCTGGTAATTTAATCGATGACGACCAACTATATAACGTAATAGTTACCGCTCACGCTTTTGTAATAATTTTTTTTATAGTTATGCCTATTATAATT	Gammarus_pulex	species	1	1	1					1									1																1								1	1				1
contig_0039	CACTCTTTACTTTATTTTCGGGATCTGATCAGGTCTAATCGGATCCTCTTTAAGATTTATTATTCGTATAGAATTAAGAACCCCTGGAAGATTTATTGGTAATGATCAAATTTATAATGTAATTGTTACATCCCATGCATTTATTATAATTTTTTTTATAGTTATACCAATTATAATC	Hydropsyche_botosaneanui	species	1	1	1						1		1	1	1				1	1														1					1			1			1	1
contig_0043	ATTATATTTTATTTTTGGTGCTTGGGCAGGTATAGTGGGTACATCTTTAAGACTTTTAATTCGAGCTGAACTAGGTAACCCTGGCTCTTTAATTGGGGACGATCAAATTTATAATGTTATTGTTACTGCGCATGCGTTTATTATAATTTTCTTTATAGTAATGCCTATTATAATT	Procloeon_bifidum	species	0	1	1
contig_0047	TACTTTATACTTCATCTTTGGGGCCTGGGCAGGAATAGTAGGTACATCTTTAAGCCTACTAATTCGTGCTGAATTGGGACAACCCGGATCCTTAATTGGCGATGACCAAATTTATAATGTTATTGTAACTGCCCACGCTTTTATTATAATTTTCTTCATAGTTATACCTATTATAATT	Ecdyonurus_venosus	species	1	1	1
contig_0053	TACTTTGTACTTAATTTTTGGAATCTGATGCGGGTTAGTAGGAACAGGATTATCTCTCCTAATTCGACTTGAATTAGGTACTACACTTGTTCTTTTAGATGAACATTTTTATAATGTTATTGTGACTGCTCATGCTTTTATTATAATTTTTTTTATAGTTATACCTATAATAATT	Planorbarius_corneus	species	1	1	1
contig_0054	AACTTTATATTTTATATTTGGAATTTGATCTGGTTTAGTTGGATCATCAATAAGTCTTATCATTCGAATAGAACTAAGAACTCCTGGAAGATTTATTGGAAATGATCAAATTTATAATGTTATTGTTACATCTCATGCATTTATTATAATTTTCTTTATAGTAATGCCTATTATAATT	Hydropsyche_modesta	species	1	1	1	1			1			1				1		1		1		1		1		1									1		1				1	1
contig_0055	AACTTTATATTTTATATTAGGTATATGGGCCGGAATAATTGGAATATCAATAAGATGAATTATCCGAATTGAACTAGGACAACCAGGATCATTTATTGGAAACGATCAAATCTATAACGTAATTGTAACAGCCCACGCATTTATTATAATTTTCTTTATGGTAATACCAATCATAATT	Velia_saulii	species	1	1	1
contig_0058	TTTATATTTCATTTTTGGTGCATGATCAGGTATGGTGGGTACTTCCCTTAGTTTATTAATTCGAGCAGAACTTGGTAATCCTGGTTCTTTGATTGGTGATGATCAGATTTATAACGTTATTGTCACCGCCCATGCTTTTATTATGATTTTTTTTATAGTGATACCTATTATAATT	Baetis_fuscatus	species	0	1	1
contig_0061	TACTTTATATTTCATTTTTGGTGCATGATCAGGTATGGTGGGTACTTCCCTTAGTTTATTAATTCGAGCAGAACTTGGTAATCCTGGTTCTTTGATTGGTGATGATCAGATTTATAACGTTATTGTCACCGCCCATGCTTTTATTATGATTTTTTTTATAGTGATACCGATTATAATT	Baetis_fuscatus	species	1	1	1
contig_0067	AACTTTATATTTTATTTTTGGAATTTGAGCAAGATTAATTGGTACATCATTAAGAATAATCATTCGAATTGAATTAAGAACTCCTGGATCATTTATAGGAAATGATCAAATCTATAATTCAATTGTCACTATCCATGCTTTTATTATAATTTTTTTTATAGTTATACCTATTATAATT	Psychomyia_pusilla	species	1	0	1
contig_0069	TACTTTATACTTTATTTTCGGGGCTTGAGCTGGAATAGTAGGTACATCTCTTAGATTATTAATTCGTGCCGAACTTGGTAATCCCGGCTCACTAATTGGGGATGACCAAATTTATAACGTCATTGTTACGGCGCATGCCTTTATTATAATTTTTTTTATAGTGATACCAATTATAATT	Baetis_lutheri	species	1	1	1																										1								1		1	1
contig_0070	AACTTTATATTTTATTTTTGGAGCCTGAGCTGGAATAGTGGGTACTTCCCTTAGTATACTTATTCGAGCCGAATTAGGACACCCAGGATCTCTAATTGGAGACGACCAAATTTATAATGTAATTGTTACTGCTCATGCTTTTGTAATAATTTTTTTTATAGTTATACCAATTATAATT	Wihelmia	Genus	1	1	1																														1	1
contig_0077	GACTTTATATTTTATTTTTGGTATTTGATCAGGTATAGTGGGTACTTCTTTGAGCTTAATAATTCGTACAGAATTAGGTCAGCCAGGTTATTTAATTGGAGATGACCAAATTTATAATGTTATTGTAACTGCTCATGCTTTTATTATAATTTTCTTTATAGTTATACCTATTATAATT	Oligoneuriella_rhenana	species	1	1	1
contig_0078	AACACTATATTTTATTTTTGGGGCATGGTCAGGAATAGTTGGTACTTCCCTTAGTATCCTAATTCGAGCTGAACTAGGACATGCCGGCTCCCTAATTGGAGACGATCAAATTTATAATGTAATCGTTACTGCTCATGCTTTTGTAATAATTTTTTTTATAGTTATACCTATTTTAATT	Cricotopus_trifascia	species	1	1	1																																					1
contig_0079	AACATTATATTTTATTTTTGGAGCATGATCTGGAATAGTAGGTACTTCCCTTAGTATCTTAATTCGAGCCGAATTAGGCCATGCAGGATCCTTAATTGGAGACGATCAAATTTATAACGTAATTGTTACTGCTCATGCTTTTGTAATAATTTTTTTTATAGTTATACCCATTTTAATT	Orthocladiinae_sp1	Subfamily	1	0	1
contig_0085	AACATTATACTTCATTTTTGGAGCCTGATCAGGAATAGTCGGAACTTCCTTAAGAATACTTATTCGAGCTGAATTAGGTCATCCCGGAACTTTAATTGGAGATGATCAAATCTATAATGTAATTGTAACAGCACACGCTTTTATTATAATTTTTTTCATAGTAATACCTATTCTTATT	Chironominae_sp	subfamily	1	0	1																														1
contig_0087	AACTTTATATTTTATTTTTGGTGCTTGATCAGGAATAGTAGGAACTTCTTTAAGAATTTTAATTCGTGCTGAATTAGGTCATCCAGGTTCTTTAATTGGAGATGACCAAATTTATAATGTTATTGTTACAGCTCATGCTTTTGTAATAATTTTTTTCATAGTTATACCTATTATAATT	Orthocladiinae_sp2	Subfamily	1	1	1			1
contig_0091	TACTCTATATTTCATTTTTGGTGCTTGGGCAGGTATGGTAGGGACCTCATTAAGACTTTTAATTCGAGCCGAGTTGGGTAACCCGGGTTCATTAATTGGTGACGATCAAATTTATAACGTAATCGTAACTGCTCATGCCTTTATTATGATTTTTTTTATAGTGATACCTATTATAATT	Baetis_rhodani	species	1	1	1
contig_0093	AACTTTATACTTCATTTTTGGGGCTTGATCTGGTATAGTAGGGACATCTCTTAGTCTACTAATTCGAGCTGAATTAGGACAACCAGGATCCCTTATTGGAGACGACCAAATTTACAATGTAATTGTCACAGCCCATGCCTTTATTATAATTTTCTTCATGGTTATGCCCATTATAATT	Heptagenia_sulphurea	species	1	1	1					1
contig_0094	TACTCTCTACTTTATTTTTGGTGCCTGATCAGGAATAGTAGGAACATCTTTAAGTTTATTAATTCGTGCAGAATTGGGGAATCCCGGCTCATTAATCGGTGATGACCAAATCTATAATGTAATTGTTACTGCTCATGCATTTATTATAATTTTTTTTATAGTGATACCTATTATGATT	Baetis_scambus	species	1	1	1
contig_0114	AACTTTATATTTTATTTTTGGAGCCTGAGCTGGAATAGTAGGTACTTCCCTTAGTATACTTATTCGAGCCGAATTAGGACACCCAGGATCTCTAATTGGAGACGACCAAATTTATAATGTAATTGTTACTGCTCATGCTTTTGTAATAATTTTTTTTATAGTTATACCAATTATAATT	Wihelmia	Genus	1	1	1					1																													1
contig_0121	CACTTTATATTTCATTTTTGGTGCGTGATCAGGTATGGTGGGTACTTCCCTTAGTTTATTAATTCGAGCAGAACTTGGTAATCCTGGTTCTTTGATTGGCGATGATCAGATTTATAACGTTATTGTCACTGCCCATGCTTTTATTATGATTTTTTTTATAGTGATACCTATTATAATT	Baetis_fuscatus	species	1	1	1									1																											1
contig_0122	AACCTTATATTTTATTTTCGGAGCTTGAGCTGGAATAGTTGGGACTTCCCTTAGTATACTAATTCGAGCTGAATTAGGTCATCCTGGTTCACTTATTGGTGATGATCAAATTTATAATGTAATTGTTACAGCTCATGCTTTTGTAATAATTTTTTTTATAGTTATACCTATTATAATT	Simulium_bezzii	species	1	1	1																																			1		1
contig_0123	TACACTTTATTTTATTTTCGGAGCGTGGTCGGGGATGGTAGGCACATCTCTGAGTCTTTTAATTCGAGCCGAATTGGGTAATCCTGGTTCACTAATTGGGGATGACCAGATTTACAACGTTATTGTAACAGCCCATGCTTTTATTATGATTTTTTTTATAGTAATGCCAATTATGATT	Baetis_buceratus	species	1	1	1																														1
contig_0124	AACCTTATATTTTATTTTTGGTGCTTGATCAGGGATAGTGGGAACTTCTTTAAGAATTCTTATTCGAGCTGAACTTGGTCATGCGGGATCTTTAATCGGAGACGATCAAATTTACAATGTAATTGTTACTGCACACGCCTTTGTAATAATTTTTTTTATAGTTATACCTATTTTAATT	Synorthocladius_semivirens	species	1	1	1
contig_0129	AACTTTATATTTTATTTTTGGAGCGTGATCTGGTATAGTAGGCACTTCTTTAAGAATTTTAATTCGAGCCGAATTAGGTCACGCAGGATCTTTAATTGGAGATGACCAAATTTATAACGTAATTGTTACCGCACATGCTTTTGTTATAATTTTTTTTATAGTAATACCTATTTTAATT	Orthocladius_rubicundus	species	1	0	1																																					1
contig_0131	AACATTATATTTTATTTTCGGAGCATGATCAGGAATAGTAGGAACTTCTCTTAGAATCTTAATTCGTGCAGAACTTGGTCACGCCGGGTCCCTTATTGGTGATGATCAAATTTATAACGTAATTGTTACAGCACATGCTTTTGTAATAATTTTTTTTATGGTTATACCTATTTTGATT	Orthocladiinae_sp3	Subfamily	1	1	1
contig_0136	CACCCTCTACCTAGTATTTGGTGCCTGAGCGGGCATAGTCGGAACTGCCCTAAGCCTATTGATCCGGGCCGAACTTAGTCAGCCAGGGTCCCTCCTTGGCGACGACCAAATCTATAACGTTATTGTTACCGCACATGCCTTTGTCATAATCTTCTTTATAGTAATGCCCATCCTCATC	Barbatula	Genus	1	1	0																																					1
contig_0144	AACTTTATATTTCATTTTTGGAGCTTGAGCTGGAATAGTTGGAACTTCTTTAAGTTTATTAATTCGTGCTGAACTTGGACAACCCGGATCTTTAATTGGAGATGATCAAGTTTATAATGTTATTGTAACTGCTCATGCATTTGTAATAATTTTTTTTATGGTTATACCTATTATAATT	Taeniopteryx_schoenemundi	species	1	1	1														1	1		1	1						1																1	1	1
contig_0153	AATATTATATTTTATTTTAGGAATTTGAGCAGGAATACTCGGGACTTCATTAAGAATATTAATTCGATTAGAATTAAGATCCCCCGGATTCCTAATTGGAAATGATCAAATTTATAATGTAATTGTAACTAGACATGCTTTTATCATAATTTTCTTTATAGTAATACCTATTATAGTA	Hydroptila_angulata	species	1	0	1
contig_0159	AACATTATATTTTATTTTTGGAGCTTGATCCGGAATAGTAGGGACAGCTTTAAGTATATTAATTCGAGCAGAATTAGGCCATCCTGGAACTTTTATTGGTGATGATCAAATTTATAATGTAATCGTAACAGCTCACGCTTTTATTATAATTTTTTTTATAGTTATACCTATTTTAATT	Microtendipes_confinis	species	1	1	1
contig_0171	TACACTTTATTTTATTTTCGGAGCGTGGTCGGGGATGGTAGGCACATCTCTGAGTCTTTTAATTCGAGCCGAATTGGGTAATCCTGGTTCACTAATTGGGGATGACCAGATTTACAACGTTATTGTAACAGCCCATGCTTTTATTATGATTTTTTTTATAGTAATGCCGATTATGATT	Baetis_buceratus	species	1	1	1
contig_0173	CCTTTATTTTATTTTCGGTATCTGATCAGGTCTCGTAGGATCATCACTTAGATTTATTATTCGAATAGAATTAAGAACTCCTGGTAGATTTATTGGCAACGACCAAATTTATAACGTAATTGTTACATCTCATGCATTTATTATAATTTTTTTTATAGTTATACCAATCATAATT	Hydropsyche_pellucidula	species	0	1	1										1																		1															1
contig_0188	TACTCTATATTTCATTTTTGGTGCTTGGGCAGGTATAGTAGGGACCTCATTAAGACTTTTAATTCGAGCCGAGTTGGGTAACCCGGGTTCATTAATTGGGGACGATCAAATTTATAACGTAATCGTAACTGCTCATGCCTTTATTATGATTTTTTTTATAGTGATACCTATTATAATT	Baetis_rhodani	species	1	1	1
contig_0201	TACTTTATACTTCATTTTTGGTGCCTGAGCTGGAATAGTTGGGACGTCTTTGAGACTCCTTATTCGGGCAGAATTGGGTAACCCGGGATCATTGATTGGAGATGACCAAATTTACAACGTGATTGTCACTGCTCACGCTTTTATTATGATTTTCTTCATGGTTATGCCCATTATGATT	Baetis_muticus	species	1	1	1
contig_0209	AACACTATATTTCATTTTTGGAGCCTGAGCAGGTATAGTAGGGACGTCTTTAAGACTCCTTATTCGAGCTGAATTAGGACAACCAGGATCCCTGATTGGTGATGACCAAATTTATAATGTCATCGTAACAGCACACGCATTTGTAATAATTTTTTTTATAGTAATGCCTATTATAATT	Leuctra_fusca	species	1	1	1			1
contig_0211	TACTCTTTATTTTATTTTTGGGGCTTGAGCAGGTATAGTAGGTACTTCGTTAAGACTTTTAATTCGGGCTGAGTTGGGTAACCCGGGTTCATTAATTGGTGATGACCAAATTTACAACGTAATTGTAACTGCCCACGCCTTTATTATAATTTTTTTTATAGTGATACCTATTATAATT	Baetis_rhodani	species	1	1	1
contig_0214	AACTTTATACTTCATTTTTGGAGCTTGAGCAGGAATAGTAGGAACTTCTCTTAGAATACTAATTCGAGCTGAATTAGGTCATCCCGGATCCCTTATTGGTGATGATCAAATTTATAATGTTATTGTTACAGCTCATGCTTTTGTCATAATTTTTTTTATAGTAATACCTATTATAATT	Simulium_sp1	Genus	1	0	1																																					1	1
contig_0225	AACACTATATTTCATTTTTGGAGCCTGAGCAGGTATAGTAGGGACGTCTTTAAGACTCCTTATTCGAGCTGAATTAGGGCAACCAGGATCCCTGATTGGTGATGACCAAATTTATAATGTCATCGTAACAGCACACGCATTTGTAATAATTTTTTTTATAGTAATACCTATTATAATT	Leuctra_fusca	species	1	1	1
contig_0238	TACTCTTTATTTTATTTTCGGAGCTTGATCTGGAATAGTAGGTACTTCTTTAAGTATCTTAATTCGTTTAGAATTAGGTCATCCAGGTTCTTTAATTGGAGATGATCAAATCTATAATGTAATTGTTACAGCTCATGCCTTTGTTATAATTTTTTTTATAGTTATACCTATCTTAATT	Thienemanniella	Genus	1	1	1
contig_0252	TTTATATTTCATCTTTGGTGCTTGGGCTGGTATAGTAGGTACGTCATTGAGTTTATTAATCCGAGCTGAATTGGGTAACCCTGGGTCTTTAATTGGTGATGACCAAATTTATAATGTGATCGTTACAGCCCATGCCTTTATCATAATTTTTTTTATGGTTATACCTATTATAATC	Procloeon	Genus	0	1	1
contig_0277	TACTTTATACTTCATCTTTGGGGCTTGAGCAGGTATGGTTGGAACCTCTTTAAGCCTGCTTATTCGGGCTGAGCTTGGTCAGCCAGGATCTTTGATTGGGGATGACCAAATTTACAATGTTATTGTAACTGCTCACGCCTTTATTATAATTTTCTTCATGGTAATGCCCATTATAATTG	Ecdyonurus_sp3	Genus	1	1	1
contig_0282	TACTCTATATTTCATTTTTGGTGCTTGGGCAGGTATGGTAGGTACCTCATTAAGACTTTTAATTCGAGCCGAGTTGGGTAACCCGGGTTCATTAATTGGGGACGATCAAATTTATAACGTAATCGTAACTGCTCATGCCTTTATTATGATTTTTTTTATAGTGATACCTATTATAATT	Baetis_rhodani	species	1	1	0
contig_0298	TCTTTATTTTATCTTTGGTGCATGAGCAGGAATAGTAGGAACTTCTTTAAGTTTACTTATTCGAGCTGAATTAGGTCAACCCGGGTCATTGATTGGGGATGATCAAATTTATAATGTTATTGTGACAGCACACGCTTTTATTATGATTTTCTTTATAGTTATGCCTATTATAATT	Rhithrogena_gratianopolitana	species	0	1	1
contig_0310	AACACTTTATTTTATTTTTGGTGCTTGATCAGGAATAGTAGGAACTTCTTTAAGAATTTTAATTCGAGCTGAATTAGGTCATGCCGGTTCTTTAATTGGCGATGATCAAATTTATAATGTTATTGTTACAGCTCATGCTTTTGTTATAATTTTTTTTATAGTTATACCTATTTTAATT	Orthocladius_sp1	Subfamily	1	1	1																																							1
contig_0312	AACCTTATATTTTATTTTCGGAGCTTGAGCTGGAATAGTTGGGACTTCCCTTAGTATACTAATTCGAGCTGAATTAGGTCATCCTGGTTCACTTATTGGGGATGATCAAATTTATAATGTAATTGTTACAGCTCATGCTTTTGTAATAATTTTTTTTATAGTTATACCTATTATAATT	Simulium_bezzii	species	1	1	1																														1
contig_0318	AACCTTATACTTCATCTTAGGTGCTTGAGCTAGTGTAGTGGGAACCTCACTAAGAGTAATTATCCGGTCAGAACTCAGGTCACCGGGAAACCTCATAAATGATGACCAGCTATATAACGTCACAGTAACTGCCCATGCTTTTGTAATAATTTTTTTTATAGTGATACCCATTATAATC	Gammarus_fossarum	species	1	1	1																				1										1
contig_0319	AACATTATATTTCATTTTTGGAGCATGATCAGGCATAGTGGGAACTTCACTAAGAATTTTAATTCGTGCAGAACTAGGGCACGCCGGCTCATTAATTGGTGATGATCAGATTTATAATGTAATTGTTACTGCTCATGCTTTTGTCATGATCTTTTTTATAGTTATACCTATTTTAATT	Orthocladiinae_sp4	Subfamily	1	0	1
contig_0322	AACTCTATACTTTATTTTCGGAGCTTGAGCAGGAATAGTAGGAACTTCCCTAAGTATACTTATTCGAGCAGAATTAGGACACCCTGGTTCTTTGATTGGGGATGACCAAATTTATAACGTAATTGTTACAGCTCATGCATTTGTAATAATTTTTTTTATAGTAATACCAATTATAATT	Simulium_velutinum	species	1	1	1
contig_0324	AACATTATATTTTATTTTTGGCGCTTGGTCAGGAATAGTGGGTACCTCCCTTAGTATCCTTATTCGGGCCGAGCTAGGTCATGCTGGCTCTTTAATTGGAGACGACCAAATTTATAATGTAATTGTTACTGCTCATGCTTTTGTAATAATTTTTTTTATAGTAATACCTATTCTAATT	Orthocladiinae_sp5	Subfamily	1	1	1																	1													1							1					1	1
contig_0333	AACTTTATATTTTATTTTTGGAGCCTGAGCTGGAATAGTGGGTACTTCCCTTAGTATACTTATTCGAGCCGAATTAGGACACCCAGGCTCTCTAATTGGAGACGACCAAATTTATAATGTAATTGTTACTGCTCATGCTTTTGTAATAATTTTTTTTATAGTTATACCAATTATAATT	Wihelmia	Genus	1	1	1
contig_0345	AACATTATATTTTATTTTTGGTGCTTGATCAGGTATAGTTGGAACTTCTTTAAGAATTTTAATTCGTGCTGAATTAGGACACGCTGGATCTTTAATCGGAGACGATCAAATTTACAATGTAATTGTAACTGCTCATGCTTTTGTAATGATTTTTTTTATAGTTATACCTATTTTAATT	Cricotopus_rufiventris	species	1	0	1																																					1						1
contig_0346	TACTTTATATTTTATTTTCGGTGCTTGATCAGGAATAGTAGGAACTTCTTTAAGAATTTTAATTCGTGCAGAATTAGGTCACGCAGGTTCATTAATTGGTGATGATCAAATTTATAATGTTATTGTAACAGCTCATGCTTTTGTAATAATTTTTTTTATAGTAATACCTATTTTAATT	Orthocladius_nitidoscutellatus	species	1	1	1																																					1		1				1
contig_0347	TACTTTATATTTCATCTTTGGTGCATGATCAGGTATGGTGGGTACTTCCCTTAGTTTATTAATTCGGGCAGAACTTGGTAATCCTGGTTCTTTGATTGGTGATGATCAGATTTATAACGTTATTGTCACCGCCCATGCTTTTATTATGATTTTTTTTATAGTGATACCGATTATAATT	Baetis_fuscatus	species	1	1	1																																		1
contig_0349	AACTTTATATTTCATTTTTGGAGCTTGAGCTGGAATAGTTGGAACTTCTTTAAGTTTATTAATTCGTGCTGAACTTGGGCAACCCGGGTCTTTAATTGGAGATGATCAAGTTTATAATGTTATTGTAACTGCTCATGCATTTGTAATAATTTTTTTTATGGTTATACCTATTATAATT	Taeniopteryx_schoenemundi	species	1	1	1															1		1	1						1
contig_0350	AACACTTTATTTTATTTTTGGTGCTTGATCAGGAATAGTAGGAACTTCTTTAAGAATTTTAATTCGAGCTGAATTAGGTCATGCCGGTTCTTTAATTGGCGATGATCAAATCTATAATGTTATTGTTACAGCTCATGCTTTTGTTATAATTTTTTTTATAGTTATACCTATTTTAATT	Orthocladius_sp2	Genus	1	1	1
contig_0353	AACCCTTTATTTTATTTTTGGTGCTTGATCTGGTATAGTTGGTACTTCTTTAAGAATGCTAATTCGAGCAGAATTAGGACGTCCAGGGACATTTATTGGAGATGACCAAGTTTATAATGTTATTGTAACAGCTCATGCTTTTATTATAATTTTTTTTATAGTTATACCTATTTTAATT	Rheotanytarsus_sp1	subfamily	1	1	1
contig_0357	AACACTTTATTTTATTTTTGGTGCTTGATCAGGAATAGTAGGAACTTCTTTAAGAATTTTAATTCGTGCCGAATTAGGTCATGCCGGTTCTTTAATTGGTGATGATCAAATTTATAATGTTATCGTTACTGCTCATGCTTTTGTTATAATTTTTTTTATAGTAATGCCTATTTTAATT	Orthocladius_sp3	Genus	1	1	1																																					1						1
contig_0361	AACATTATATTTTATTTTTGGCGCTTGAGCTGGAATAGTAGGGACTTCTTTAAGTATTTTAATTCGAGCTGAATTAGGCCATCCTGGAGCTTTAATTGGAGACGATCAAATTTATAATGTTATTGTAACAGCTCATGCTTTTGTAATAATTTTTTTTATAGTTATACCAATTATAATT	Ceratopogonidae	family	1	1	1																																							1				1
contig_0362	AACTCTTTATTTTATTTTCGGAGCTTGATCTGGAATAATCGGAACCTCACTAAGATTGCTCATTCGTGCTGAATTAGGTCAACCGGGATCGTTAATTGGAGACGACCAAATTTATAATGTTATTGTAACTGCTCATGCATTTATTATAATTTTCTTTATAGTAATACCTATTATAATT	Ephemera_danica	species	1	1	1																																											1
contig_0365	TACTTTATATTTTATTTTCGGTGCTTGAGCCGGAATAGTTGGAACTTCCCTTAGTTTAGTAATTCGAGCTGAATTAGGACAACCTGGTAGGTTAATTGGTGATGACCAGATCTATAATGTTGTAGTGACTGCCCATGCATTTGTAATAATTTTTTTTATAGTTATGCCTATTATAATT	Anapagurus_hyndmanni	species	1	1	1
contig_0369	AACATTATATTTTATTTTTGGCGCTTGAGCTGGAATAGTAGGGACTTCTTTAAGTATTTTAATTCGAGCTGAATTAGGCCATCCTGGAGCTTTAATTGGAGACGATCAAATTTATAATGTTATTGTAACAGCTCATGCTTTTGTAATAATTTTTTTTATAGTTATACCAATCATAATT	Ceratopogonidae	family	1	1	1																																							1
contig_0370	AACTTTATATTTTATTTTTGGAGCCTGAGCTGGAATAGTAGGTACTTCCCTTAGTATACTTATTCGAGCCGAATTAGGACACCCAGGGTCTCTAATTGGAGACGACCAAATTTATAATGTAATTGTTACTGCTCATGCTTTTGTAATAATTTTTTTTATAGTTATACCAATTATAATT	Wihelmia	Genus	1	1	1																														1
contig_0372	TACTTTATATTTTATTTTTGGAGCCTGATCTGGAATGGTTGGAACTTCTCTAAGAATTCTAATTCGAGCCGAATTAGGGCACGCCGGTTCTTTAATTGGCGACGATCAAATTTATAATGTAATTGTAACAGCACACGCTTTTGTTATAATTTTTTTTATAGTTATACCTATTTTAATC	Paracladius_sp_1	Genus	1	1	0																																					1						1
contig_0373	CCTTTATTTTATTTTTGGAGCTTGAGCTGGAATAGTAGGAACCTCATTAAGCCTTCTTATTCGGGCTGAATTAGGCCAGCCTGGGTCTTTGATTGGAGATGACCAAATTTATAATGTCATTGTCACTGCCCATGCTTTTATCATGATTTTCTTTATAGTTATGCCAATTATGATT	Rhithrogena_sp1	Genus	0	1	1
contig_0399	TACTCTTTATTTTATCTTTGGTGCATGAGCAGGAATAGTAGGAACTTCTTTAAGTTTACTTATTCGAGCTGAATTAGGTCAACCCGGATCATTGATTGGGGATGACCAAATTTATAATGTTATTGTGACAGCACATGCTTTTATTATGATTTTCTTTATAGTTATGCCTATTATAATT	Rhithrogena_gratianopolitana	species	1	1	1
contig_0417	AACTCTCTATTTCATTCTAGGGGTCTGAGCAGGTATGGTTGGTGCTGGTATAAGCCTTCTCATTCGAATCGAGCTAAGGCAACCAGGTGCCTTCCTAGGAAGGGACCAACTATATAATACAATTGTTACAGCCCATGCATTTGTAATAATTTTCTTTCTGGTTATACCTGTATTTATT	Eisenia_andrei	species	1	1	1
contig_0426	AACTTTATATTTTATTTTTGGAGCCTGAGCTGGAATAGTGGGTACTTCCCTTAGTATACTTATTCGAGCCGAATTAGGACACCCAGGATCTCTAATTGGAGACGACCAAATTTATAATGTAATTGTTACTGCCCATGCTTTTGTAATAATTTTTTTTATAGTTATACCAATTATAATT	Wihelmia	Genus	1	1	1																														1				1
contig_0434	CACTCTTTATTTTATATTTGGAATCTGATCAGGTCTTGTAGGATCATCATTAAGTTTTATTATTCGAATAGAATTAAGAACTCCTGGAAGATTTATTGGAAATGATCAAATTTATAATGTTGTAGTAACTTCTCATGCTTTTATCATAATTTTTTTTATAGTAATGCCTATTATAATC	Hydropsyche_instabilis	species	1	1	0
contig_0476	AACATTATATTTTATTTTTGGAGCTTGATCCGGAATAGTAGGAACAGCTTTAAGTATATTAATTCGAGCAGAATTAGGTCATCCAGGAACTTTTATTGGTGATGATCAAATTTATAATGTAATTGTAACAGCTCACGCTTTTATTATAATTTTTTTTATAGTTATACCTATTTTAATT	Microtendipes_confinis	species	1	1	1
contig_0488	AACACTATATTTTATTTTTGGGGCTTGATCCGGAATGCTGGGCACCTCTCTAAGCCTTCTAATTCGTGCCGAGCTGGGGCACCCGGGTTCTTTAATTGGCGACGATCAAATTTACAATGTAATCGTCACAGCCCATGCTTTTATTATGATTTTTTTCATGGTTATGCCTATTATAATC	Caenis_pusilla	species	1	1	1
contig_0493	TTTATATTTCATTTTTGGTGCGTGATCAGGTATGGTGGGTACTTCCCTTAGTTTATTAATTCGAGCAGAACTTGGTAATCCTGGTTCTTTGATTGGTGATGATCAGATTTATAACGTTATTGTCACTGCCCATGCTTTTATTATGATTTTTTTTATAGTGATACCTATTATAATT	Baetis_fuscatus	species	0	1	1
contig_0549	AACACTATATTTCATTTTTGGAGCCTGAGCAGGTATAGTAGGGACGTCCTTAAGACTCCTTATTCGAGCTGAATTAGGACAACCAGGATCCCTGATTGGTGATGACCAAATTTATAATGTCATCGTAACAGCACACGCATTTGTAATAATTTTTTTTATAGTAATGCCTATTATAATT	Leuctra_fusca	species	1	1	1			1
contig_0601	TACTTTATACTTCATTTTTGGTGCCTGAGCTGGAATAGTGGGGACGTCTTTGAGAATCCTTATTCGGGCAGAATTGGGTAACCCGGGATCATTGATTGGAGATGACCAAATTTACAACGTGATTGTCACTGCTCACGCTTTTATTATAATTTTTTTCATGGTTATGCCCATTATGATT	Baetis_muticus	species	1	1	1
contig_0611	AACTTTATATTTTATTTTTGGAGCCTGAGCAGGAATAGTAGGAACATCATTAAGAATTCTTATTCGAGCTGAATTAGGTCACGCCGGTTCATTAATTGGTGATGATCAAATTTATAATGTAATTGTAACAGCTCATGCTTTTGTAATAATTTTTTTTATAGTTATACCTATTTTAATT	Pipunculidae	family	1	1	1
contig_0613	AACTTTATATTTTATTTTTGGGGCCTGAGCTGGAATAGTAGGTACTTCCCTTAGTATACTTATTCGAGCCGAATTAGGACACCCAGGGTCTCTAATTGGAGACGACCAAATTTATAATGTAATTGTTACTGCTCATGCTTTTGTAATAATTTTTTTTATAGTTATACCAATTATAATT	Wihelmia	Genus	1	1	1
contig_0616	AACTTTATATTTTATTTTTGGAGCGTGATCTGGTATAGTAGGCACTTCTTTAAGAATTTTAATTCGAGCCGAATTAGGTCACGCAGGATCTTTAATTGGAGATGACCAAATTTATAATGTAATTGTTACCGCACATGCTTTTGTTATAATTTTTTTTATAGTAATACCTATTTTAATT	Orthocladius_rubicundus	species	1	0	1
contig_0617	TACTCTTTACTTTATTTTTGGCGCGTGGTCGGGGATGGTAGGTACTTCCCTTAGATTGTTGATTCGAGCTGAATTAGGTAGTCCTGGCTCATTAATTGGTGATGACCAGATTTACAACGTAATTGTTACGGCCCATGCGTTTATTATAATCTTTTTTATAGTGATACCTATTATGATT	Baetis	Genus	1	1	1									1
contig_0636	AACTTTATATTTCATTTTTGGGGTTTGGTCAGGCATATTAGGGACTTCCCTCAGTTTATTAATCCGGGCCGAATTAGGCCACCCTGGTTCTTTAATTGGCGATGACCAAATTTATAATGTAATTGTCACCGCCCATGCCTTCATTATAATTTTTTTTATAGTAATACCTATTATGATT	Caenis_pseudorivulorum	species	1	0	1
contig_0638	AACTTTATACTTTATTTTTGGGGCTTGATCAGGAATAATTGGAACTTCTTTAAGTCTATTAATTCGAGCAGAATTAGGACAACCCGGTTCTCTAATTGGAGATGACCAAATTTATAATGTTATTGTTACTGCTCATGCATTTATTATAATTTTCTTTATAGTAATACCTATTATAATT	Ephemera_glaucops	species	1	1	1
contig_0647	TACTTTATACTTTATTTTCGGGGCTTGAGCTGGAATAGTAGGTACATCTCTTAGATTATTAATTCGTGCCGAACTTGGTAATCCCGGCTCACTAATTGGGGACGACCAAATTTATAACGTCATTGTTACGGCGCATGCCTTTATTATAATTTTTTTTATAGTGATACCAATTATAATT	Baetis_lutheri	species	1	1	1
contig_0652	AACTCTTTATTTTATTTTTGGTGCTTGAGCTGGTATAGTTGGTTCAGCATTAAGTGTTTTAATTCGATTAGAACTTGGACAACCTGGTAGTTTAATTGGAGATGATCAAATTTATAATACTATTGTTACAGCTCATGCATTTGTAATAATCTTCTTTATAGTGATACCTATTATAATT	Crustacea	subphyllum	1	1	1
contig_0653	TACACTTTATTTCATTTTTGGGGCTTGGGCGGGTATAGTGGGTTCTGCTTTAAGAGTTTTAATTCGATTAGAGTTAGGGCAACCAGGGAGGTTGATCGGTGATGATCAGGTTTATAATACAATTGTTACTGCTCATGCTTTTGTAATAATTTTTTTCATAGTTATACCTATCATAATT	Mysidacea	superorder	1	1	0
contig_0656	AACTTTATATTTTATTTTTGGAGCCTGAGCTGGAATAGTAGGTACTTCCCTTAGTATACTTATTCGAGCCGAATTAGGACATCCAGGATCTCTAATTGGAGACGACCAAATTTATAATGTAATTGTTACTGCTCATGCTTTTGTAATAATTTTTTTTATAGTTATACCAATTATAATT	Wihelmia	Genus	1	1	1
contig_0660	AACTTTATATTTTATATTTGGAATTTGATCTGGTTTAGTTGGGTCATCAATAAGTCTTATCATTCGAATAGAACTAAGAACTCCTGGAAGATTTATTGGAAATGATCAAATTTATAATGTTATTGTTACATCTCATGCATTTATTATAATTTTCTTTATAGTAATGCCTATTATAATT	Hydropsyche_modesta	species	1	1	1
contig_0661	AACCTTATACTTCATCTTAGGTGCTTGAGCTAGTGTAGCGGGAACCTCACTAAGAGTAATTATCCGGTCAGAACTCAGGTCACCGGGAAACCTCATAAATGATGACCAGCTATATAACGTCACAGTAACTGCCCATGCTTTTGTAATAATTTTTTTTATAGTGATACCCATTATAATC	Gammarus_fossarum	species	1	1	1
contig_0671	TACATTATATTTTATTTTTGGAGCTTGATCAGGAATAGTAGGAACATCCTTAAGTATATTAATTCGAGCAGAATTAGGTCATCCTGGAACCTTAATTGGAGATGATCAAATTTATAACGTTATTGTAACAGCTCATGCTTTTATTATAATTTTTTTTATAGTTATACCTATTTTAATT	Polypedilum	Genus	1	1	1
contig_0673	AACCCTTTATTTTATTTTTGGTGCTTGATCTGGTATAGTTGGTACTTCTTTAAGAATGCTAATTCGAGCAGAATTAGGACGTCCAGGAACATTTATTGGAGATGACCAAGTTTATAATGTTATTGTAACAGCTCATGCTTTTATTATAATTTTTTTTATAGTTATACCTATTTTAATT	Rheotanytarsus_sp2	Genus	1	1	1																																					1
contig_0680	TACTTTATACTTTATCTTAGGAGCTTGGGCTAGCGTTGTTGGCACTTCCATGAGAGTAATTATTCGCTCAGAACTAAGTACACCTGGTAATTTAATCGATGACGACCAACTATATAACGTAATAGTTACCGCTCACGCTTTTGTAATAATTTTTTTTATAGTTATGCCTATTATAATT	Gammarus_pulex	species	1	1	0				1
contig_0699	AACTTTATATTTTATTTTTGGAGCCTGAGCTGGAATAGTAGGTACTTCCCTTAGTATACTTATTCGAGCCGAATTAGGACACCCAGGCTCTCTAATTGGAGACGACCAAATTTATAATGTAATTGTTACTGCTCATGCTTTTGTAATAATTTTTTTTATAGTTATGCCAATTATAATT	Wihelmia	Genus	1	1	1																														1
contig_0701	TTCTTTATATTTTATTTTCGGAGCATGATCAGGAATAGTAGGAACTTCATTAAGAATTATTATTCGAGCTGAATTAGGACATGTTGGTTCTTTAATTGGCGATGATCAAATTTATAATGTAGTTGTTACAGCCCATGCTTTTGTTATAATTTTTTTTATAGTTATACCCATTTTAATT	Orthocladiinae_sp6	Subfamily	1	0	1
contig_0728	AACATTATATTTTATTTTTGGCGCTTGGTCAGGAATAGTGGGTACCTCCCTTAGTATCCTTATTCGGGCCGAGCTAGGTCATGCTGGCTCTTTAATTGGGGACGACCAAATTTATAATGTAATTGTTACTGCTCATGCTTTTGTAATAATTTTTTTTATAGTAATACCTATTCTAATT	Orthocladiinae_sp7	Subfamily	1	0	1																																					1
contig_0734	ATTATATTTTATTTTTGGTGCTTGGGCAGGTATAGTGGGTACATCTTTAAGACTTTTAATTCGAGCTGAACTAGGTAACCCTGGCTCTTTAATTGGGGACGATCAAATTTATAACGTTATTGTTACTGCGCATGCGTTTATTATAATTTTCTTTATAGTAATGCCTATTATAATT	Procloeon_bifidum	species	0	1	1
contig_0737	TACCCTTTATCTTGTATTTGGTGCCTGAGCCGGAATAGTGGGGACTGCTTTAAGCCTCCTCATTCGAGCTGAGTTGAGCCAACCTGGCTCACTTCTAGGTGATGACCAAATTTATAATGTAATCGTTACTGCCCACGCCTTCGTAATAATTTTCTTTATAGTAATACCAATTCTCATT	Gobio_gobio	species	1	1	0
contig_0738	AACATTATACTTCATTTTTGGAGCCTGAGCAGGAATAGTAGGAACGTCATTAAGACTCCTAATCCGAGCTGAATTAGGGCAACCAGGATCCCTGATTGGAGATGATCAAATCTATAATGTTATCGTAACAGCGCATGCATTTGTAATAATCTTCTTTATAGTTATGCCTATTATAATT	Leuctridae	family	1	0	1
contig_0747	AACTTTATATTTTATATTTGGAATTTGATCTGGTTTAGTTGGATCATCAATAAGTCTTATCATTCGAATAGAACTAAGAACTCCTGGAAGATTTATTGGAAATGATCAAATTTATAATGTTATTGTTACATCTCATGCATTTATTATAATTTTCTTTATAGTAATGCCTATTATAATC	Hydropsyche_modesta	species	1	0	1
contig_0750	AACCCTATATTTTATTTTCGGGGCTTGAGCTGGAATAGTTGGCACTTCACTAAGTATATTAATTCGGGCTGAATTAGGCCACCCTGGTGCATTAATTGGAAACGATCAAATTTATAATGTGATTGTTACTGCTCACGCTTTCGTCATAATTTTCTTTATGGTTATACCTATTATAATC	Schizophora	Superfamily	1	0	1
contig_0753	AACTTTATATTTCATTTTTGGAGCTTGAGCTGGAATAGTTGGAACTTCTTTAAGTTTATTAATTCGTGCTGAACTTGGACAACCCGGGTCTTTAATTGGAGATGATCAAGTTTATAATGTTATTGTAACTGCTCATGCATTTGTAATAATTTTTTTTATGGTTATACCTATTATAATT	Taeniopteryx_schoenemundi	species	1	1	1																																									1
contig_0788	AACACTATACTTCATTTTTGGAGCCTGGGCAGGAATAGTAGGGACGTCATTAAGACTCCTTATCCGAGCTGAATTAGGGCAACCAGGGTCTCTAATTGGAGACGACCAAATTTATAATGTCATCGTAACAGCACATGCATTTGTAATAATCTTCTTTATGGTTATGCCTATTATAATT	Leuctridae	family	1	0	1
contig_0789	AACACTATACTTCATTTTTGGAACCTGGGCAGGAATAGTAGGGACGTCATTAAGACTCCTTATCCGAGCTGAATTAGGGCAACCAGGATCTCTGATTGGAGACGACCAAATCTATAATGTCATCGTAACAGCACATGCATTTGTAATAATCTTCTTTATGGTTATGCCTATTATAATT	Leuctridae	family	1	1	1
contig_0790	AACACTATACTTCATTTTTGGAGCCTGAGCAGGAATAGTAGGAACGTCATTAAGACTCCTAATCCGAGCTGAATTAGGGCAACCAGGATCCCTGATTGGAGATGATCAAATCTATAATGTTATCGTAACAGCACATGCATTTGTAATAATCTTCTTTATAGTTATACCTATTATAATT	Leuctridae	family	1	0	1
contig_0791	AACACTATACTTCATTTTTGGAGCCTGAGCAGGAATAGTAGGAACGTCATTAAGACTCCTAATCCGAGCTGAATTAGGGCAACCAGGTTCCCTGATTGGAGATGATCAAATCTATAATGTTATCGTAACAGCGCATGCATTTGTAATAATCTTCTTTATAGTTATGCCTATTATAATT	Leuctridae	family	1	0	1
contig_0792	AACACTATACTTCATTTTTGGAGCCTGGGCAGGAATAGTAGGGACGTCATTAAGACTCCTTATCCGAGCTGAATTAGGGCAACCAGGATCTCTGATTGGAGACGACCAAATCTATAATGTCATCGTAACAGCACATGCATTTGTAATAATCTTCTTTATGGTTATGCCTATTATAATT	Leuctridae	family	1	1	1
contig_0799	CACTTTATATTTTATTTTCGGAGCTTGAGCAGGAATAGTAGGAACTTCCCTTAGAATCCTTGTACGAGCCGAATTAGGCCACCCAGGAGCTCTAATTGGCGACGATCAAATTTATAATGTAATTGTTACAGCTCACGCTTTTGTAATAATTTTTTTTATAGTTATACCAATTATAATT	Wiedemannia_bistigma	species	1	1	1
contig_0847	AACATTATATTTTATTTTTGGGGCCTGAGCAGGAATAGTAGGTACTTCCCTTAGTATACTTATTCGAGCTGAATTAGGACACCCAGGATCTTTAATTGGTGATGACCAAATTTATAATGTAATTGTTACAGCTCATGCTTTCGTAATAATTTTTTTTATAGTTATACCAATTATAATT	Wihelmia	Genus	1	1	1
contig_0876	AACACTTTATTTTATCTTTGGAGCATGATCGGGCATAATTGGAACCTCCCTTAGCTTATTAATCCGTGCAGAACTTGGGCAACCAGGTTCTTTAATCGGGGATGACCAAATTTATAATGTCATCGTAACAGCCCATGCTTTCGTTATGATTTTCTTTATAGTAATGCCTATTATAATT	Habroleptoides_confusa	species	1	1	1
contig_0907	TACTTTATATTTTATTTTCGGTGCTTGATCAGGAATAGTAGGAACTTCTTTAAGAATTTTAATTCGCGCAGAATTAGGTCACGCAGGTTCATTAATTGGTGATGATCAAATTTATAATGTTATTGTAACAGCTCATGCTTTTGTAATAATTTTTTTTATAGTAATACCTATTTTAATT	Orthocladius_nitidoscutellatus	species	1	0	1																																										1
contig_0909	AACTCTTTACTTTATTTTTGGAGCTTGAGCTGGAATAGTAGGTACTTCTCTAAGAATTTTAATTCGAGCTGAATTAGGCCATGCTGGCTCTTTAATTGGAGATGATCAAATTTATAATGTTATTGTTACTGCACACGCTTTTGTAATAATTTTTTTTATAGTTATACCTATTTTAATT	Orthocladius_oblidens	species	1	0	1
contig_0920	TACTTTATATTTCATTTTTGGGGCATGGGCAGGAATAGTAGGGACATCTTTAAGTCTACTGATTCGTGCTGAATTAGGTCAGCCTGGGTCTCTTATTGGTGATGACCAAATTTATAACGTCATTGTGACTGCCCATGCTTTTATTATGATTTTCTTTATAGTTATACCTATTATGATT	Ecdyonurus_sp1	Genus	1	1	1					1																		1								1			1
contig_0922	AACTTTATATTTTATTTTTGGGGCTTGATCTGGGATAGTAGGAACTTCTTTAAGAATCTTAATTCGTGCAGAATTAGGACACGTAGGATCTCTAATTGGAGACGACCAAATCTACAATGTAATTGTTACTGCTCATGCTTTCGTTATAATTTTTTTTATGGTTATACCTATTTTAATT	Orthocladiinae_sp8	Subfamily	1	1	1
contig_0928	TACTCTTTATTTTATTTTTGGTGCATGAGCAGGAATAGTAGGAACTTCTTTAAGTTTACTTATTCGAGCTGAATTAGGTCAACCCGGGTCATTGATTGGGGATGATCAAATTTATAATGTTATTGTGACAGCACACGCTTTTATTATGATTTTCTTTATAGTTATGCCTATTATAATT	Rhithrogena_gratianopolitana	species	1	1	1
contig_0944	AACTTTATATTTTATATTTGGAATTTGATCTGGTTTAGTTGGATCATCAATAAGTCTTATCATTCGAATAGAACTAAGGACTCCTGGAAGATTTATTGGAAATGATCAAATTTATAATGTTATTGTTACATCTCATGCATTTATTATAATTTTCTTTATAGTAATGCCTATTATAATT	Hydropsyche_modesta	species	1	0	1
contig_0950	TTTATACTTCATTTTTGGGGCTTGATCTGGTATAGTAGGGACATCTCTTAGTCTACTAATTCGAGCTGAATTAGGGCAACCAGGATCCCTTATTGGAGACGACCAAATTTACAATGTAATTGTCACAGCCCATGCCTTTATTATAATTTTCTTCATGGTTATGCCCATTATAATT	Heptagenia_sulphurea	species	0	1	1
contig_0956	TACACTTTATTTTATTTTCGGAGCGTGGTCGGGGATGGTAGGCACATCTCTGAGTCTTTTAATTCGAGCCGAATTGGGTAATCCTGGTTCACTAATTGGGGATGATCAGATTTACAACGTTATTGTAACAGCCCATGCTTTTATTATGATTTTTTTTATAGTAATGCCAATTATGATT	Baetis_buceratus	species	1	1	0
contig_0963	AACTTTATATTTTATTTTTGGAGCGTGATCTGGTATAGTAGGCACTTCTTTAAGAATTTTAATTCGAGCCGAATTAGGTCATGCAGGATCTTTAATTGGAGATGACCAAATTTATAACGTAATTGTTACCGCACATGCTTTTGTTATAATTTTTTTTATAGTAATACCTATTTTAATT	Orthocladius_rubicundus	species	1	0	1
contig_0966	AACATTATATTTTATTTTTGGAGCTTGAGCAGGTATAGTAGGAACCTCTTTAAGACTTCTCATCCGAGCTGAATTAGGTCAACCAGGGTCCCTAATTGGAGATGATCAGATTTACAACGTCATCGTAACAGCACACGCATTTGTCATAATTTTTTTCATGGTAATACCAATTATAATT	leuctra_geniculata	species	1	0	1																												1
contig_0969	TACTCTTTATTTTATCTTTGGTGCATGAGCAGGAATAGTAGGAACTTCTTTAAGTTTACTCATTCGAGCTGAATTAGGTCAACCCGGGTCATTGATTGGGGATGATCAAATTTATAATGTTATTGTGACAGCACACGCTTTTATTATGATTTTCTTTATAGTTATGCCTATTATAATT	Rhithrogena_gratianopolitana	species	1	1	1
contig_0970	TACTCTTTATTTTATCTTTGGTGCATGAGCAGGAATAGTAGGAACTTCTTTAAGTTTACTTATTCGAGCTGAATTAGGTCAACCTGGGTCATTGATTGGGGATGATCAAATTTATAATGTTATTGTGACAGCACACGCTTTTATTATGATTTTCTTTATAGTTATGCCTATTATAATT	Rhithrogena_gratianopolitana	species	1	1	0
contig_1002	AACACTATATTTTATTTTTGGGGCATGGTCAGGAATAGTTGGTACTTCCCTTAGTATCCTAATTCGAGCTGAACTAGGACATGCCGGCTCCCTAATTGGAGATGATCAAATTTATAATGTAATCGTTACTGCTCATGCTTTTGTAATAATTTTTTTTATAGTTATACCTATTTTAATT	Cricotopus_trifascia	species	1	1	1
contig_1003	AACATTATATTTTATTTTTGGTGCCTGATCAGGAATAGTAGGGACTTCACTAAGAATCCTTATTCGAGCTGAATTAGGGCATGCCGGATCTTTAATTGGAGACGACCAAATTTATAATGTAATTGTTACAGCTCATGCTTTTGTAATAATTTTTTTTATAGTAATACCTATTTTAATT	Paracricotopus	Genus	1	0	1
contig_1046	TACTCTTTATTTCATCTTTGGGGCTTGGTCTGGTATAGTCGGAACATCCCTCAGACTCTTAATTCGAGCTGAGCTAGGTCAGCCAGGTTCTTTGATTGGAGATGATCAAATTTATAATGTAATTGTCACCGCTCACGCCTTTATTATGATTTTCTTCATAGTTATGCCTATTATAATT	Electrogena_lateralis	species	1	1	0
contig_1066	TACTTTATATTTTATTTTTGGAGCTTGATCAGGTATAGTAGGGACTTCATTAAGTATTTTAATTCGAGCAGAATTAGGACACGCAGGATCTTTAATTGGTGATGACCAAATTTATAATGTAATTGTTACAGCTCACGCTTTTGTTATAATTTTTTTTATAGTTATACCTATTTTAATT	Orthocladiinae_sp9	Subfamily	1	1	1
contig_1073	AACACTATACTTCATTTTTGGAGCCTGAGCAGGAATAGTAGGAACGTCATTAAGACTCCTAATCCGAGCTGAATTAGGGCAACCAGGATCCCTGATTGGAGATGATCAAATCTATAATGTTATCGTAACAGCGCATGCATTTGTAATAATCTTCTTTATAGTTATGCCTATTATAATT	Leuctridae	family	1	0	1
contig_1093	AACACTATATTTTATTTTTGGGGCATGGTCAGGAATAGTTGGTACTTCCCTTAGTATCCTAATTCGAGCTGAACTAGGACATGCCGGCTCCTTAATTGGAGATGATCAAATTTATAATGTAATTGTTACTGCTCATGCTTTTGTAATAATTTTTTTTATAGTTATACCTATTTTAATT	Cricotopus_trifascia	species	1	1	1
contig_1095	AACACTATACTTCATTTTTGGAGCCTGAGCAGGTATAGTAGGGACGTCTTTAAGACTCCTTATTCGAGCTGAATTAGGACAACCAGGATCCCTGATTGGTGATGACCAAATTTATAATGTCATCGTAACAGCACACGCATTTGTAATAATTTTTTTTATAGTAATGCCTATTATAATT	Leuctra_fusca	species	1	1	1
contig_1205	AACTTTATATTTTATTTTTGGAGCCTGAGCTGGAATAGTGGGTACTTCCCTTAGTATTCTTATTCGAGCCGAATTAGGACACCCAGGATCTCTAATTGGAGACGACCAAATTTATAATGTAATTGTTACTGCTCATGCTTTTGTAATAATTTTTTTTATAGTTATACCAATTATAATT	Wihelmia	Genus	1	1	1
contig_1207	AACTTTATATTTTATTTTTGGAGCCTGAGCTGGAATAGTAGGTACTTCCCTTAGTATACTTATTCGAGCCGAATTAGGACATCCAGGCTCTCTAATTGGAGATGACCAAATTTATAATGTAATTGTTACTGCTCATGCTTTTGTAATAATTTTTTTTATAGTTATGCCAATTATAATT	Wihelmia	Genus	1	1	1
contig_1209	AACATTATATTTTATTTTTGGGGCCTGAGCAGGAATAGTAGGTACTTCCCTTAGTATACTTATTCGAGCTGAATTAGGACACCCAGGGTCTTTAATTGGTGATGACCAAATTTATAATGTAATTGTTACAGCTCATGCTTTCGTAATAATTTTTTTTATAGTTATACCAATTATAATT	Wihelmia	Genus	1	1	1
contig_1216	TACTCTATATTTCATTTTTGGTGCTTGGGCAGGTATGGTAGGGACCTCATTAAGACTTTTAATTCGAGCCGAGTTGGGTAACCCGGGTTCATTAATTGGGGACGATCAAATTTATAACGTAATCGTAACTGCCCATGCCTTTATTATGATTTTTTTTATAGTGATACCTATTATAATT	Baetis_rhodani	species	1	1	1
contig_1218	AACACTATATTTCATTTTTGGAGCCTGAGCAGGTATAGTAGGGACGTCTTTAAGACTTCTTATTCGAGCTGAATTAGGACAACCAGGATCCCTGATTGGTGATGACCAAATTTATAATGTCATCGTAACAGCACACGCATTTGTAATAATTTTTTTTATAGTAATGCCTATTATAATT	Leuctra_fusca	species	1	1	1
contig_1228	AACTTTATATTTTATTTTTGGGGCGTGATCTGGTATAGTAGGCACTTCTTTAAGAATTTTAATTCGAGCCGAATTAGGTCACGCAGGATCTTTAATTGGAGATGACCAAATTTATAACGTAATTGTTACCGCACATGCTTTTGTTATAATTTTTTTTATAGTAATACCTATTTTAATT	Orthocladius_rubicundus	species	1	1	1
contig_1229	AACTTTATATTTTATTTTTGGAGCCTGGGCAGGAATAGTAGGAACATCTTTAAGAATTCTTATTCGAGCTGAATTAGGTCACGCCGGTTCATTAATTGGTGATGATCAAATTTATAATGTAATTGTAACAGCTCATGCTTTTGTAATAATTTTTTTTATAGTTATACCTATTTTAATT	Orthocladiinae_sp10	Subfamily	1	0	1
contig_1231	AACTTTATATTTTATTTTTGGAATTTGAAGAGGTATAGTAGGAACATCCTTAAGAATACTAATTCGAAGGGAATTAGGGACTAATAGATTTTTAATTGGAAACGATCAAATTTATAATGTAATTGTTACAGCTCATGCATTTATTATAATTTTTTTTATAGTTATACCTATTATAATT	Agapetus_cravensis	species	1	0	1
contig_1232	AACATTATATTTTATTTTCGGAGCATGATCAGGAATAGTAGGAACTTCTCTTAGAATCTTAATTCGTGCAGAACTTGGTCACGCCGGGTCCCTTATCGGTGATGATCAAATTTATAACGTAATTGTTACAGCACATGCTTTTGTAATAATTTTTTTTATAGTTATACCTATTTTGATT	Orthocladiinae_sp11	Subfamily	1	0	1
contig_1233	TACTCTATATTTCATTTTTGGTGCTTGGGCAGGTATGGTAGGGACCTCATTAAGACTTTTAATTCGAGCCGAGTTGGGTAACCCGGGTACATTAATTGGTGACGATCAAATTTATAACGTAATCGTAACTGCTCATGCCTTTATTATGATTTTTTTTATAGTGATACCTATTATAATT	Baetis_rhodani	species	1	1	1
contig_1271	TACTTTATACTTCATTTTTGGGGCCTGGGCTGGGATAGTAGGAACATCTTTAAGTCTATTAATTCGTGCTGAGTTAGGACAGCCTGGTTCTTTAATTGGGGACGACCAAATTTATAATGTTATTGTCACTGCTCACGCTTTTATTATGATTTTTTTCATAGTTATGCCTATTATAATT	Ecdyonurus_macani	species	1	1	1										1
contig_1323	TTTATACTTCATCTTTGGAGCCTGGGCAGGGATAGTAGGTACATCTTTAAGTCTACTAATTCGTGCTGAATTGGGACAACCCGGATCCTTAATCGGTGATGACCAAATTTATAATGTTATTGTAACTGCCCACGCTTTTATTATGATTTTCTTCATAGTTATACCTATTATAATT	Ecdyonurus_venosus	species	0	1	1
contig_1326	TTTATGTTTCATTTTTGGTGCATGATCAGGTATGGTGGGTACTTCCCTTAGTTTATTAATTCGAGCAGAACTTGGTAATCCTGGTTCTTTGATTGGTGATGATCAGATTTATAACGTTATTGTCACTGCCCATGCTTTTATTATGATTTTTTTTATAGTGATACCTATTATAATT	Baetis_fuscatus	species	0	1	1
contig_1354	AAATTTATATTTTATTTTTGGAGCCTGAGCTGGAATAGTAGGTACTTCCCTTAGTATACTTATTCGAGCCGAATTAGGACACCCAGGATCTCTAATTGGAGACGACCAAATTTATAATGTAATTGTTACTGCTCATGCTTTTGTAATAATTTTTTTTATAGTTATACCAATTATAATT	Wihelmia	Genus	1	1	1																														1										1
contig_1355	AACACTATTTCATTTTTGGAGCCTGAGCAGGTATAGTAGGGACGTCTTTAAGACTCCTTATTCGAGCTGAATTAGGACAACCAGGATCCCTGATTGGTGATGACCAAATTTATAATGTCATCGTAACAGCACACGCATTTGTAATAATTTTTTTTATAGTAATGCCTATTATAATT	Leuctra_fusca	species	1	0	1			1																											1
LFCR_001630	TACTTTATACTTTATTTTCGGGGCTTGAGCTGGAATAGTAGGTACATCTCTTAGATTATTAATTCGTGCCGAACTTGGCAATCCCGGCTCACTAATTGGGGATGACCAAATTTATAACGTCATTGTTACGGCGCATGCCTTTATTATAATTTTTTTTATA	Baetis_lutheri	species	1	0	0
LFCR_001878	TACTTTATACTTCATTTTTGGGGCATGGGCAGGAATAGTAGGGACATCTTTAAGTCTACTGATTCGTGCTGAATTAGGTCAGCCTGGGTCTCTTATTGGTGATGACCAAATTTATAACGTCATTGTGACTGCCCATGCTTTTATTATGATTTTCTTTATA	Ecdyonurus_sp1	Genus	1	0	0
LFCR_003139	TACCCTTTATTTTATTTTCGGAATTTGATCAGGTTTAGTAGGATCATCTTTAAGATTTATTATTCGTATAGAATTAAGAACTCCTGGTAGATTTATTGGTAATGATCAAATTTATAATGTAATTGTTACATCTCACGCATTCATTATAATTTTTTTTATA	Hydropsyche_incognita	species	1	0	0															1
LFCR_003941	AACTTTATACTTTATTTTTGGTGCTTGAGCAGGAATAGTGGGGACATCCCTAAGCCTATTAATTCGGGCTGAACTTGGCCAGCCCGGCTCCCTGATTGGAGACGACCAAATTTATAATGTGATTGTCACAGCCCACGCCTTCGTAATAATTTTCTTTATA	Dinocras_cephalotes	species	1	0	0																												1									1
LFCR_005797	CACCCTTTATTTTATTTTCGGAATTTGATCAGGTTTAGTAGGATCATCTTTAAGATTTATTATTCGTATAGAATTAAGAACTCCTGGTAGATTTATTGGTAATGATCAAATTTATAATGTAATTGTTACATCTCACGCATTCATTATAATTTTTTTTATA	Hydropsyche_incognita	species	1	0	0		1			1		1			1	1				1	1					1									1							1
LFCR_006104	TACTTTATATTTCATTTTTGGGGCATGGGCAGGGATAGTAGGGACATCTTTAAGTCTACTGATTCGTGCTGAATTGGGTCAGCCTGGGTCTCTTATTGGTGACGACCAAATTTATAACGTCATTGTGACTGCCCATGCTTTTATTATGATTTTCTTTATA	Ecdyonurus_sp1	Genus	1	0	0
LFCR_006421	AACTTTATACATTATTTTTGGGGCTTGATCCGGAATAGTGGGAACTTCATTAAGAATGCTTATTCGAGCAGAATTAGGACGACCCGGAACTTTCATTGGAGATGACCAAATTTATAATGTTGTAGTTACTGCACATGCTTTTATTATAATTTTTTTCATA	Chironomus_riparius	species	1	0	0
LFCR_007070	AACTTTATACTTTATTTTTGGTGCTTGAGCAGGAATAGTGGGGACATCCCTAAGCCTATTAATTCGGGCTGAACTTGGCCAGCCCGGCTCCCTGATTGGAGACGACCAAATCTATAATGTGATTGTCACAGCCCACGCCTTCGTAATAATTTTCTTTATA	Dinocras_cephalotes	species	1	0	0							1																							1
LFCR_008076	TACTTTATATTTCATTTTTGGGGCCTGGGCAGGGATAGTAGGGACATCTTTAAGTCTACTGATTCGTGCTGAATTGGGTCAGCCTGGGTCTCTTATTGGTGACGACCAAATTTATAACGTCATTGTGACTGCCCATGCTTTTATTATGATTTTCTTTATA	Ecdyonurus_sp1	Genus	1	0	0
LFCR_008359	AACTCTGTATTTCATCTTCGGAGCCTGATCAGGTATAGTCGGTACATCTCTGAGTTTACTGATTCGAGCAGAACTAGGCCAGCCAGGCTCCTTAATTGGAGATGATCAAATCTATAATGTTATTGTAACAGCGCATGCTTTTGTAATAATTTTCTTTATG	Perla_marginata	species	1	0	0
LFCR_008603	CACCCTTTATTTTATTTTCGGAATTTGATCAGGTTTAGTAGGATCATCTTTAAGATTTATTATTCGTATAGAATTAAGAACTCCTGGTAGATTTATCGGTAATGATCAAATTTATAATGTAATTGTTACATCTCACGCATTCATTATAATTTTTTTTATA	Hydropsyche_incognita	species	1	0	0					1
LFCR_009263	AACTTTATACTTTATTTTTGGTGCTTGAGCAGGAATAGTGGGGACATCCCTAAGCCTATTAATTCGAGCTGAACTTGGCCAGCCCGGCTCCCTGATTGGAGACGACCAAATTTATAATGTGATTGTCACAGCCCACGCCTTCGTAATAATTTTCTTTATA	Dinocras_cephalotes	species	1	0	0																																					1
LFCR_011524	AACCCTTTATTTTATTTTCGGGGCTTGATCTGGTATAATCGGAACTTCTTTAAGAATATTAATTCGAGCAGAATTGGGTCACCCAGGAACATTAATTGGAGACGATCAAATTTATAATGTAATTGTAACTGCTCATGCTTTTATTATAATTTTTTTTATA	Virgatanytarsus_triangularis	species	1	0	0
LFCR_013205	TACTCTTTACTTTATTTTCGGGATCTGATCAGGTCTAATCGGATCCTCTTTAAGATTTATTATTCGTATAGAATTAAGAACCCCTGGAAGATTTATTGGTAATGATCAAATTTATAATGTAATTGTTACATCCCATGCATTTATTATAATTTTTTTTATA	Hydropsyche_botosaneanui	species	1	0	0						1
LFCR_030633	TACTTTATACTTTATTTTCGGCGCTTGAGCTGGAATAGTAGGTACATCTCTTAGATTATTAATTCGTGCCGAACTTGGCAATCCCGGCTCACTAATTGGGGATGACCAAATTTATAACGTCATTGTTACGGCGCATGCCTTTATTATAATTTTTTTTATA	Baetis_lutheri	species	1	0	0
LFCR_046156	TACTTTATACTTTATCTTAGGGGCTTGGGCTAGGGTTGTTGGCACTTCCATGAGAGTAATTATTCGCTCAGAATTAAGCACACCTGGTAATTTAATCGACGACGACCAATTATATAATGTCATAGTTACCGCTCACGCTTTTGTAATAATTTTTTTTATG	Gammarus_pulex	species	1	0	0
LFCR_047898	TACATTATATTTTATCTTCGGAGCATGATCCGGAATAGTTGGAACTTCCCTGAGTCTTTTAATTCGTGCTGAATTAGGACAACCGGGTTCACTAATTGGTGATGATCAAATTTATAATGTAATCGTTACTGCTCATGCTTTTGTTATAATTTTCTTTATA	Besdolus_ravizzarum	species	1	0	0
LFCR_054681	AACTTTATATTTTATTTTTGGAATTTGAGCAAGATTAATTGGCACATCACTAAGAATAATTATTCGAATTGAATTAAGAACTCCAGGATCATTTATAGGAAATGATCAAATTTATAATTCAATTGTTACTATTCATGCTTTTATTATAATTTTTTTTATA	Psychomyia	Genus	1	0	0
LFCR_078044	AACATTATATTTCATTCTTGGTTCATGATCAGGAATATTAGGAATAGCATTAAGATTATTAATTCGAGCCGAACTAGGAACTCCAGGGTCTCTAATTGGAGATGACCAAATCTATAATGTTATTGTTACAGCTCATGCCTTTATCATAATTTTCTTCATA	Limnius_volckmari	species	1	0	0																																							1
LFCR_078152	TACTTTATATTTTATTTTTGGAGCCTGATCTGGAATGGTTGGAACTTCTCTAAGAATTCTAATTCGAGCCGAATTAGGGCACGCCGGTTCTTTAATTGGCGACGATCAAATTTATAATGTAATTGTAACGGCACACGCTTTTGTTATAATTTTTTTTATA	Paracladius_sp2	Genus	1	0	0																																		1
LFCR_106444	AACTTTATACTTCATTTTTGGGGCTTGATCCGGAATAGTGGGTACTTCCCTTAGTATCCTTATTCGAGCAGAACTCGGACATGCTGGTTCCTTAATTGGGGATGATCAGATCTATAATGTAATTGTAACAGCTCATGCTTTTGTAATGATTTTTTTTATG	Orthocladiinae_sp12	Subfamily	1	0	0
LFCR_136981	CACCCTATATCTAGTATTTGGTGCTTGAGCCGGAATAGTAGGCACAGCTTTAAGCCTCCTAATTCGAGCAGAACTAAGCCAACCCGGCGCCCTTTTGGGGGACGACCAGATTTATAATGTAATTGTTACAGCCCATGCTTTCGTAATAATTTTCTTTATA	Cottus	species	1	0	0					1					1		1			1		1			1				1
LFCR_146039	AACTTTATATTTTATTTTTGGAGCTTGATCCGGAATAGTAGGAACATCTTTAAGTATTTTAATTCGAACTGAATTAGGACATCCAGGAGCTTTAATTGGAGATGATCAAATTTATAATGTTATTGTGACTGCTCATGCTTTTGTAATAATTTTTTTTATA	Conchapelopia	Genus	1	0	0
LFCR_181422	AACTTTATATTTTATTTTCGGGGCTTGATCTGGAATAGTTGGTACTTCTTTAAGAATTTTAATTCGCGCCGAATTAGGTCACGCCGGATCCTTAATTGGTGATGACCAAATTTATAACGTAATTGTCACTGCTCATGCTTTTGTAATAATTTTTTTTATA	Orthocladiinae_sp13	Subfamily	1	0	0																									1
LFCR_192097	AACTTTATACTTCATTTTTGGGGCTTGATCCGGAATAGTGGGTACTTCCCTTAGTATCCTTATTCGAGCAGAACTCGGACATGCTGGTTCCTTAATTGGGGATGATCAAATCTATAATGTAATTGTAACAGCTCATGCTTTTGTAATGATTTTTTTTATG	Chironomidae_sp	family	1	0	0
LFCR_207025	AATTTTATATTTTATTTTGGGGATATGAGCTGGAATAGTCGGAACATCTCTAAGAATATTAATTCGTCTAGAATTAAGATCCCCCGGATTTTTAATTGGTAATGATCAAATTTATAATGTAATTGTTACAGCCCATGCATTCATTATAATTTTTTTTATG	Hydroptila_vectis	species	1	0	0
MFZR_010307	CCTTTATCTTGTATTTGGTGCCTGGGCCGGAATGGTAGGGACCGCCCTAAGCCTTCTTATTCGGGCCGAACTAAGCCAGCCTGGCTCGCTATTAGGTGATAGCCAAATTTATAATGTTATTGTTACCGCCCACGCCTTCGTAATAATTTTCTTTATAGTCATGCCAATTCTCATT	Phoxinus_phoxinus	species	0	1	0
MFZR_011649	TCTTTATTTTATATTTGGAATCTGATCAGGTTTAGTAGGATCATCTTTAAGTTTTATTATTCGAATAGAATTAAGAACTCCTGGAAGATTTATTGGAAATGACCAAATTTATAATGTTGTAGTAACTTCTCATGCTTTTATCATAATTTTTTTTATAGTAATACCCATTATAATC	Hydropsyche_instabilis	species	0	1	0					1
MFZR_078596	GCTATATCTACTATTTGGTGCTTGAGCCGGAATAGTTGGTACAGCCTTAAGTCTCTTAATCCGTGCTGAATTAGGCCAACCCGGAGCACTACTGGGTGATGATCAAATCTATAACGTTATTGTCACAGCCCATGCATTTGTCATAATTTTCTTTATAGTTATACCAATTATGATT	Glis_glis	species	0	1	0
MFZR_098458	TCTTTATTTTATCTTTGGTGCATGAGCAGGAATAGTAGGAACTTCTTTAAGTTTACTTATTCGAGCTGAATTAGGTCAACCCGGATCATTGGTTGGGGATGACCAAATTTATAATGTTATTGTGACAGCACATGCTTTTATTATGATTTTCTTTATAGTTATGCCTATTATAATT	Rhithrogena_sp2	Genus	0	1	0
MFZR_104274	ACTTTATTTTATTTTTGGTGCTTGATCAGGAATAGTAGGAACTTCTTTAAGAATTTTAATTCGTGCCGAATTAGGTCATGCCGGTTCTTTAATTGGTGATGATCAAATTTATAATGTTATCGTTACTGCTCATGCTTTTGTTATAATTTTTTTTATGGTAATGCCTATTTTAATT	Orthocladius_sp4	Genus	0	1	0
MFZR_105726	TTTATATTTTATTTTTGGAGCTTGAGCTGGAATAGTAGGTACTTCCCTTAGTATCTTAATTCGAGCTGAGCTTGGACATCCTGGTTCTTTAATTGGAGATGATCAAATTTATAATGTAATTGTAACAGCACATGCTTTTGTAATAATTTTTTTTATAGTTATACCTATTATAATT	Diamesa_hyperborea	species	0	1	0
MFZR_105956	ACTATATTTTATTTTTGGTGCTTGAGCTGGAATAGTAGGAACTTCTTTAAGTATTTTAATTCGACCTGAATTGGGACATCTTGGAGCTTTAATTGGTGATGATCAAATTTATAATGTTATTGTAACAGCTCATGCTTTTGTAATAATTTTTTTTATAGTTATACCAATTATAATT	Diptera	Order	0	1	0																																							1
MFZR_107689	ATTATATTTTATTTTTGGTGCTTGAGCTGGAATAGTAGGAACTTCTTTAAGTATTTTAATTCGAGCTGAATTAGGACATCTCGGAGCTTTAATTGGTGATGATCAAATTTATAATGTTATTTTAACAGCTCATGCTTTTGTAATAATTTTTTACATAGTTATACCAATTACAATT	Chyromyidae	family	0	1	0																																							1
MFZR_107832	ACTTTATTTTATTTTTGGTGCTTGATCAGGAATAGTAGGAACTTCTTTAAGAATTTTAATTCGTGCCGAATTAGGTCATGCCGGTTCTTTAATTGGTGATGATCAAATTTATAATGTTATCGTTACTGCTCATGCTTTTGTTATAATTTTTTTTATAGTAATACCTATTTTAATT	Orthocladius_sp5	Genus	0	1	0
MFZR_108726	ACTATATTTTATTTTTGGTGCTTGAGCTGGAATAGTAGGAACTTCTTTAAGTATTTTAATTCGAGCTGAATTAGGATATCCTGGAGCTTTAATTGGCGATGATCAAATTTATAATGTTATTGTAACAGCCCACGTTTTTGTAATAATTTTTTTTATAGTTATACCAATTATAATT	Diptera	Order	0	1	0																																							1
MFZR_109154	ATTATATATTATTTTTGGTTGTAATAGTAGGAACTTCATTAAGAATTTTAATTCCTAAGAAGTCCCAGGAGTTCTTACCTGGAACTTTATTGGGTGATGATCAAATTTATAACAGCTTATACTTTTTTAATAATTTTTTTATAGTTAAACCAATCATAATT	Perla_marginata	species	0	1	0																																							1
MFZR_175644	TTTATATTTTATTTTTGGAGCTTGATCAGGTATAGTAGGAACTTCATTAAGTATTTTAATTCGAGCAGAATTAGGACACGCAGGATCTTTAATTGGTGATGACCAAATTTATAATGTAATTGTTACAGCTCACGCTTTTGTTATAATTTTTTTTATAGTTATACCTATTTTAATT	Orthocladiinae_sp14	Subfamily	0	1	0
MFZR_192494	ACTTTATTTTATTTTCGGAGCGTGGTCGGGGATGGTAGGCACATCTCTGAGTCTTTTAATTCGAGCCGAATTGGGTAATGCTGGTTCACTAATTGGGGATGACCAGATTTACAACGTTATTGTAACAGCCCATGCTTTTATTATGATTTTTTTTATAGTAATGCCAATTATGATT	Baetis_buceratus	species	0	1	0
MFZR_216372	TTTATATTTTATTTTCGGAGCTTGGGCAGGAATAGTAGGAACTTCTCTTAGAATCCTTGTACGAGCCGAATTAGGCCACCCAGGAGCTCTAATTGGCGACGATCAAATTTATAATGTAATTGTTTCAGCCCACGCTTTTGTAATAATTTTTTTTATAGTTATACCAATTATAATT	Wiedemannia_bistigma	species	0	1	0
MFZR_217455	TCTTTATTTCATCTTTGGGGCTTGGTCTGGTATAGTCGGAACATCCCTCAGACTCTTAATTCGAGCTGAACTAGGTCAGCCAGGTTCTTTGATTGGAGATGATCAAATTTATAATGTAATTGTCACCGCTCACGCCTTTATTATGATTTTCTTCATAGTTATACCTATTATAATT	Electrogena_lateralis	species	0	1	0
ZFZR_005719	AGCGTGATCAGGTATGGTGGGTACTTCCCTTAGTTTATTAATTCGAGCAGAACTTGGTAATCCTGGTTCTTTGATTGGCGATGATCAGATTTATAACGTTATTGTCACTGCCCATGCTTTTATTATGATTTTTTTTATAGTGATACCTATTATAATT	Baetis_fuscatus	species	0	0	1
ZFZR_007853	AATCTGAGCTGGTATGGTAGGATCTTCATTAAGTTTAATTATTCGAACTGAACTTGGAATACCAGGATCTTTAATCGGAAATGATCAAATTTATAATGTAATTGTAACAGCACATGCATTTGTTATAATTTTTTTTATAGTTATACCAATTATAATT	Rhyacophila_meridionalis	species	0	0	1												1																		1								1
ZFZR_020341	GGCTTGAGCTGGAATAGTTGGAACTTCTTTAAGTTTACTAATTCGAGCAGAATTAAGTCAACCAGGTGTATTTATTGGAAATGATCAAATTTATAATGTTATTGTAACTGCTCATGCTTTTATTATAATTTTTTTTATAGTAATACCAATCATAATT	Culex_pipiens	species	0	0	1
ZFZR_021541	AATCTGAGCTGGTATAGTGGGATCTTCATTAAGTTTAATTATTCGAACTGAACTTGGAATACCAGGATCTTTAATCGGAAATGATCAAATTTATAATGTAATTGTAACAGCACATGCATTTGTTATAATTTTTTTTATAGTTATACCAATTATAATT	Rhyacophila_meridionalis	species	0	0	1																																					1
ZFZR_036012	AATCTGAGCTGGTATAGTAGGATCTTCATTAAGTTTAATTATTCGAACTGAACTTGGAATACCAGGATCTTTAATCGGAAATGATCAAATTTATAATGTAATTGTAACAGCACATGCATTTGTTATAATTTTTTTTATAGTTATACCAATTATAATT	Rhyacophila_meridionalis	species	0	0	1
ZFZR_042085	AGCCTGATCCGGAATAGTGGGCACTTCTTTAAGAATTTTAATTCGAGCAGAGCTTGGACACGTTGGGTCCTTAATTGGAGACGACCAAATTTACAATGTAATTGTTACAGCTCATGCTTTTGTAATAATTTTTTTTATGGTTATACCTATTTTAATT	Tvetenia_calvescens	species	0	0	1																																					1
ZFZR_050133	AGCCTGAGCAGGTATAGTAGGGACATCTTTAAGACTCCTTATTCGAGCTGAATTAGGACAACCAGGATCCCTGATTGGTGATGACCAAATTTATAATGTCATCGTAACAGCACACGCATTTGTAATAATTTTTTTTATAGTAATGCCTATTATAATT	Leuctra_fusca	species	0	0	1
ZFZR_061976	AGCCTGAGCTGGAATAGTAGGTACTTCCCTTAGTATACTTATTCGAGCCGAATTAGGACACCCAGGATCTCTAATTGGAGACGACCAAATTTATAATGTAATTGTTACTGCTCATGCTTTTGTAATAATTTTTTTTATAGTAATACCTATTCTAATT	Wihelmia	Genus	0	0	1
ZFZR_062114	TGCTTGATCAGGAATAGTAGGAACTTCTTTAAGAATTCTAATTCGAGCTGAATTAGGTCACGCTGGTTCATTAATTGGAGATGATCAAATTTATAATGTAATTGTAACGGCTCATGCTTTTGTAATAATTTTCTTTATAGTTATACCTATTTTAATT	Rheocricotopus_chalybeatus	species	0	0	1																														1
ZFZR_063528	AGCCTGAGCTGGAATAGTAGGTACTTCCCTTAGTATGCTTATTCGAGCCGAATTAGGACACCCAGGATCTCTAATTGGAGACGACCAAATTTATAATGTAATTGTTACTGCTCATGCTTTTGTAATAATTTTTTTTATAGTTATACCAATTATAATT	Wihelmia	Genus	0	0	1
ZFZR_072877	AATTTGAGCAGGAATAATTGGGTCTTCTCTAAGAATTTTAATTCGATTAGAATTAAGTCAAATTAATTCAATTATTAATAATAACCAATTATATAACGTAATTGTAACTATTCATGCTTTTATTATAATTTTTTTTATAACTATACCAATTGTAATT	Therioaphis_riehmi	species	0	0	1
ZFZR_111980	GGCCTGATCAGGTATAGTAGGGACTTCTTTAAGAATTTTAATTCGTGCAGAATTAGGACATGCCGGATCATTAATCGGTGATGATCAAATTTATAATGTAATTGTAACAGCTCATGCTTTTGTAATAATTTTTTTTATAGTAATACCTATTCTAATT	Orthocladiinae_sp15	Subfamily	0	0	1
ZFZR_112064	AGCCTGAGCAGGAATAGTAGGAACATCATTAAGAATTCTTATTCGAGCTGAATTAGGTCACGCCGGTTCATTGATTGGTGATGATCAAATTTATAATGTAATTGTAACAGCTCATGCTTTTGTAATAATTTTTTTTATAGTTATACCTATTTTAATT	Orthocladiinae_sp16	Subfamily	0	0	1
ZFZR_113483	AGCCTGAGCAGGAATAGTAGGAACATCATTAAGAATTCTTATTCGAGCTGAATTAGGCCACGCCGGTTCATTAATTGGTGATGATCAAATTTATAATGTAATTGTAACAGCTCATGCTTTTGTAATAATTTTTTTTATAGTTATACCTATTTTAATT	Orthocladiinae_sp17	Subfamily	0	0	1
ZFZR_148502	AATCTGAGCTGGTATAGTGGGATCTTCATTAAGTTTAATTATTCGAACTGAACTTGGAATACCAGGATCTTTAATCGGAAATGATCAAATTTATAATGTAATTGTAACAGCACACGCATTTGTTATAATTTTTTTTATAGTTATACCAATTATAATT	Rhyacophila_nubila	species	0	0	1
ZFZR_186618	AGCATGGTCTAGAATAGTAGGAACTTCTTTAAGTATATTAATTCGAGCAGAACTAGGATACCCCAATTCATTAATTGGAGACGATCAAATTTATAATGTAATTGTAACAGCTCATGCTTTTATTATAATTTTTTTTATAGTAATACCGATTATAATT	Bradysia_impatiens	species	0	0	1
ZFZR_203712	AGCCTGAGCAGGTATAGTAGGGACGTCCTTAAGACTCCTTATTCGAGCTGAATTAGGGCAACCAGGATCCCTGATTGGTGATGATCAAATTTATAATGTCATCGTAACAGCACACGCATTTGTAATAATTTTTTTTATAGTAATGCCTATTATAATT	Leuctra_fusca	species	0	0	1			1
ZFZR_231788	GGGTTGGGCAGGAATAGTAGGAACTTCTTTAAGAATATTAATTCGAGCTGAATTAGGAAATCCAGGAACATTAATTGGAGATGATCAAATTTATAATGTAATTGTAACCGCTCATGCATTCATTATAATTTTTTTCATAGTTATGCCAATTCTAATT	Hydraena	Genus	0	0	1												1
[truncated: 193 more columns]

## Sheet: ST3- TaxaNames
Table S3. Cross-reference guide for Final Taxonomic Assignment (FTA) obtained via metabarcoding and morphological assignment
Order	Final Taxonomic Assignment (FTA)	Morphological assignment
Diptera	Chironomidae_sp1	Chironomidae
	Chironominae_sp2	Chironomidae
	Conchapelopia	Chironomidae
	Diamesa_hyperborea	Chironomidae
	Polypedilum_sp	Chironomidae
	Rheotanytarsus_sp	Chironomidae
	Virgatanytarsus_triangularis	Chironomidae
	Cricotopus_rufiventris	Orthocladiinae
	Cricotopus_trifascia	Orthocladiinae
	Microtendipes_confinis	Orthocladiinae
	Orthocladiinae_sp1	Orthocladiinae
	Orthocladiinae_sp2	Orthocladiinae
	Orthocladiinae_sp3	Orthocladiinae
	Orthocladiinae_sp4	Orthocladiinae
	Orthocladiinae_sp5	Orthocladiinae
	Orthocladiinae_sp6	Orthocladiinae
	Orthocladiinae_sp7	Orthocladiinae
	Orthocladiinae_sp8	Orthocladiinae
	Orthocladiinae_sp9	Orthocladiinae
	Orthocladiinae_sp10	Orthocladiinae
	Orthocladiinae_sp11	Orthocladiinae
	Orthocladiinae_sp12	Orthocladiinae
	Orthocladius_nitidoscutellatus	Orthocladiinae
	Orthocladius_oblidens	Orthocladiinae
	Orthocladius_rubicundus	Orthocladiinae
	Orthocladius_sp1	Orthocladiinae
	Orthocladius_sp2	Orthocladiinae
	Paracladius_sp	Orthocladiinae
	Paracricotopus	Orthocladiinae
	Rheocricotopus_chalybeatus	Orthocladiinae
	Synorthocladius_semivirens	Orthocladiinae
	Tvetenia_calvescens	Orthocladiinae
	Wiedemannia_bistigma	Empididae
	Simulium_bezzii	Simuliidae
	Simulium_pseudoequinum	Simuliidae
	Simulium_sp1	Simuliidae
	Simulium_sp2	Simuliidae
	Simulium_sp3	Simuliidae
	Simulium_velutinum	Simuliidae
	Ceratopogonidae	Ceratopogonidae
	Culex_pipiens	Other Diptera
	Diptera	Other Diptera
Ephemeroptera	Alainites_muticus	Alainites_muticus
	Baetis_buceratus	Baetis
	Baetis_fuscatus	Baetis
	Baetis_lutheri	Baetis
	Baetis_pavidus	Baetis
	Baetis_rhodani	Baetis
	Baetis_scambus	Baetis
	Procloeon_bifidum	Procloeon
	Procloeon_pulchrum	Procloeon
	Caenis_pseudorivulorum	Caenis
	Caenis_pusilla	Caenis
	Serratella_ignita	Ephemerellidae
	Ephemera_danica	Ephemera
	Ephemera_glaucops	Ephemera
	Ecdyonurus_macani	Heptageniidae
	Ecdyonurus_sp1	Heptageniidae
	Ecdyonurus_sp2	Heptageniidae
	Ecdyonurus_venosus	Heptageniidae
	Electrogena_lateralis	Heptageniidae
	Heptagenia_sulphurea	Heptageniidae
	Rhithrogena_gratianopolitana	Rhithrogena
	Rhithrogena_sp1	Rhithrogena
	Rhithrogena_sp2	Rhithrogena
	Habroleptoides_confusa	Leptophlebiidae
	Oligoneuriella_rhenana	Oligoneuriella
Plecoptera	Leuctra	Leuctridae
	Leuctra_fusca	Leuctridae
	leuctra_geniculata	Leuctridae
	Leuctra_leptogaster	Leuctridae
	Dinocras_cephalotes	Dinocras
	Taeniopteryx_schoenemundi	Taeniopterygidae
	Perla_marginata	Perla
	Besdolus_ravizzarum	Perlodidae
Trichoptera	Hydropsyche_botosaneanui	Hydropsyche
	Hydropsyche_exocellata	Hydropsyche
	Hydropsyche_incognita	Hydropsyche
	Hydropsyche_instabilis	Hydropsyche
	Hydropsyche_modesta	Hydropsyche
	Hydropsyche_pellucidula	Hydropsyche
	Hydroptila_angulata	Hydroptilidae
	Hydroptila_vectis	Hydroptilidae
	Psychomyia	Psychomyiidae
	Psychomyia_pusilla	Psychomyiidae
	Rhyacophila_meridionalis	Rhyacophilidae
	Rhyacophila_nubila	Rhyacophilidae
	Agapetus_cravensis	Other Trichoptera
Coleoptera	Limnius_volckmari	Limnius
	Hydraena_gracilidelphis	Other Coleoptera
Gammaridae	Gammarus_fossarum	Gammaridae
	Gammarus_pulex	Gammaridae
Terrestrial organisms	Bradysia_impatiens	Terrestrial_organisms
	Chyromyidae	Terrestrial_organisms
	Lepidoptera	Terrestrial_organisms
	Pipunculidae	Terrestrial_organisms
	Schizophora	Terrestrial_organisms
	Therioaphis_riehmi	Terrestrial_organisms
Fish	Barbatula	Teleost
	Gobio_gobio	Teleost

## Sheet: ST4 - Diet summary
Table S4. Summary of Z. asper and C. gobio diets
							HEN				SSL				SLS
							Zingel asper		Cottus gobio		Zingel asper		Cottus gobio		Zingel asper		Cottus gobio
Higher classification	Family	Sub family	Genus	Species	FTA	Figure grouping	Proportion	Raw abundance	Proportion	Raw abundance	Proportion	Raw abundance	Proportion	Raw abundance	Proportion	Raw abundance	Proportion	Raw abundance
Diptera					Diptera	Other_Diptera	0.01	2	0	0	0	0	0	0	0	0	0	0
Diptera	Chironomidae				Chironomidae	Chironomidae	0	0	0	0	0	0	0	0	0	1	0	0
Diptera	Chironomidae	Orthocladiinae			Orthocladiinae	Orthocladiinae	0.06	9	0.04	3	0	1	0.01	1	0.1	33	0.01	1
Diptera	Chironomidae	Orthocladiinae	Orthocladius		Orthocladius	Orthocladiinae	0.07	10	0	0	0	0	0	0	0	1	0.02	2
Diptera	Chironomidae	Orthocladiinae	Orthocladius	Orthocladius_oblidens	Orthocladius_oblidens	Orthocladiinae	0	0	0	0	0	0	0	0	0	1	0	0
Diptera	Chironomidae	Orthocladiinae	Orthocladius	Orthocladius_rubicundus	Orthocladius_rubicundus	Orthocladiinae	0.01	1	0	0	0	0	0	0	0.02	6	0.02	2
Diptera	Chironomidae	Orthocladiinae	Orthocladius	Orthocladius_nitidoscutellatus	Orthocladius_nitidoscutellatus	Orthocladiinae	0.04	6	0	0	0	0	0	0	0	0	0	0
Diptera	Chironomidae	Orthocladiinae	Paracladius		Paracladius	Orthocladiinae	0.03	4	0	0	0	0	0	0	0	0	0	0
Diptera	Chironomidae	Orthocladiinae	Rheocricotopus	Rheocricotopus_chalybeatus	Rheocricotopus_chalybeatus	Orthocladiinae	0.01	1	0	0	0	0	0	0	0	0	0	0
Diptera	Chironomidae	Orthocladiinae	Tvetenia	Tvetenia_calvescens	Tvetenia_calvescens	Orthocladiinae	0.01	1	0	0	0	0	0	0	0	0	0	0
Diptera	Chironomidae	Orthocladiinae	Paracricotopus		Paracricotopus	Orthocladiinae	0	0	0	0	0	0	0	0	0	1	0	0
Diptera	Chironomidae	Orthocladiinae	Cricotopus	Cricotopus_rufiventris	Cricotopus_rufiventris	Orthocladiinae	0.02	3	0	0	0	0	0	0	0.02	5	0	0
Diptera	Chironomidae	Orthocladiinae	Cricotopus	Cricotopus_trifascia	Cricotopus_trifascia	Orthocladiinae	0.01	1	0	0	0	0	0	0	0.04	13	0	0
Diptera	Chironomidae	Chironominae			Chironominae	Chironomidae	0.01	1	0	0	0	0	0	0	0	0	0	0
Diptera	Chironomidae	Chironominae	Diamesa	Diamesa_hyperborea	Diamesa_hyperborea	Chironomidae	0.01	1	0	0	0	0	0	0	0	0	0	0
Diptera	Chironomidae	Chironominae	Microtendipes	Microtendipes_confinis	Microtendipes_confinis	Chironomidae	0	0	0	0	0	0	0	0	0.01	2	0	0
Diptera	Chironomidae	Chironominae	Polypedilum		Polypedilum	Chironomidae	0	0	0	0	0	1	0	0	0	0	0	0
Diptera	Chironomidae	Chironominae	Rheotanytarsus		Rheotanytarsus	Chironomidae	0.01	2	0	0	0	0	0	0	0.01	3	0	0
Diptera	Chironomidae	Chironominae	Synorthocladius	Synorthocladius_semivirens	Synorthocladius_semivirens	Chironomidae	0	0	0	0	0.01	2	0	0	0	0	0	0
Diptera	Chironomidae	Chironominae	Virgatanytarsus	Virgatanytarsus_triangularis	Virgatanytarsus_triangularis	Chironomidae	0	0	0	0	0	1	0	0	0	0	0	0
Diptera	Chironomidae	Tanypodinae	Conchapelopia		Conchapelopia	Chironomidae	0	0	0	0	0	0	0	0	0	0	0.01	1
Diptera	Schizophora				Schizophora	Other_Diptera	0	0	0	0	0	0	0.01	1	0	0	0	0
Diptera	Ceratopogonidae				Ceratopogonidae	Other_Diptera	0.03	4	0	0	0	0	0	0	0	0	0	0
Diptera	Chyromyidae				Chyromyidae	Other_Diptera	0.01	1	0	0	0	0	0	0	0	0	0	0
Diptera	Culicidae		Culex	Culex_pipiens	Culex_pipiens	Other_Diptera	0	0	0	0	0	1	0	0	0	1	0	0
Diptera	Simuliidae		Simulium	Simulium_bezzii	Simulium_bezzii	Simuliidae	0.03	4	0	0	0	1	0.01	1	0	1	0	0
Diptera	Simuliidae		Simulium	Simulium_velutinum	Simulium_velutinum	Simuliidae	0	0	0	0	0	1	0	0	0	0	0	0
Diptera	Simuliidae		Simulium	Simulium_pseudoequinum	Simulium_pseudoequinum	Simuliidae	0	0	0	0	0.01	2	0	0	0	1	0	0
Diptera	Simuliidae		Simulium		Simulium_sp	Simuliidae	0.08	12	0.01	1	0.11	25	0.09	7	0.03	9	0.04	3
Diptera	Sciaridae		Bradysia	Bradysia_impatiens	Bradysia_impatiens	Other_Diptera	0	0	0	0	0	0	0	0	0	1	0	0
Diptera	Pipunculidae				Pipunculidae	Other_Diptera	0	0	0	0	0	0	0	0	0.02	5	0	0
Diptera	Empididae		Wiedemannia	Wiedemannia_bistigma	Wiedemannia_bistigma	Other_Diptera	0	0	0	0	0	0	0	0	0.02	6	0	0
Ephemeroptera	Baetidae		Alainites	Alainites_muticus	Alainites_muticus	Other_Baetidae	0	0	0	0	0.01	2	0	0	0.01	2	0.01	1
Ephemeroptera	Baetidae		Baetis	Baetis_pavidus	Baetis_pavidus	Baetis	0	0	0.01	1	0.03	7	0	0	0	0	0	0
Ephemeroptera	Baetidae		Baetis	Baetis_buceratus	Baetis_buceratus	Baetis	0.01	1	0	0	0.01	2	0.02	2	0.04	13	0.05	4
Ephemeroptera	Baetidae		Baetis	Baetis_fuscatus	Baetis_fuscatus	Baetis	0.1	14	0.09	6	0.22	51	0.11	9	0.17	56	0.1	8
Ephemeroptera	Baetidae		Baetis	Baetis_lutheri	Baetis_lutheri	Baetis	0.03	5	0.01	1	0.13	31	0.07	6	0.1	31	0.1	8
Ephemeroptera	Baetidae		Baetis	Baetis_rhodani	Baetis_rhodani	Baetis	0.05	7	0	0	0.03	7	0.01	1	0.03	11	0.1	8
Ephemeroptera	Baetidae		Baetis	Baetis_scambus	Baetis_scambus	Baetis	0	0	0	0	0	0	0	0	0	0	0.01	1
Ephemeroptera	Baetidae		Procloeon	Procloeon_pulchrum	Procloeon_pulchrum	Other_Baetidae	0	0	0	0	0	0	0	0	0	1	0	0
Ephemeroptera	Baetidae		Procloeon	Procloeon_bifidum	Procloeon_bifidum	Other_Baetidae	0	0	0	0	0	0	0	0	0.01	2	0	0
Ephemeroptera	Caenidae		Caenis	Caenis_pseudorivulorum	Caenis_pseudorivulorum	Caenis	0	0	0	0	0	1	0	0	0	0	0.01	1
Ephemeroptera	Caenidae		Caenis	Caenis_pusilla	Caenis_pusilla	Caenis	0.01	1	0	0	0	0	0.01	1	0	0	0.01	1
Ephemeroptera	Heptageniidae		Ecdyonurus		Ecdyonurus	Heptageniidae	0.01	2	0.03	2	0.15	35	0.16	13	0.06	19	0.17	14
Ephemeroptera	Heptageniidae		Ecdyonurus	Ecdyonurus_macani	Ecdyonurus_macani	Heptageniidae	0	0	0.01	1	0	0	0	0	0	0	0	0
Ephemeroptera	Heptageniidae		Ecdyonurus	Ecdyonurus_venosus	Ecdyonurus_venosus	Heptageniidae	0	0	0	0	0	0	0.01	1	0.01	4	0	0
Ephemeroptera	Heptageniidae		Electrogena	Electrogena_lateralis	Electrogena_lateralis	Other_Ephemeroptera	0	0	0	0	0	0	0.01	1	0	1	0	0
Ephemeroptera	Heptageniidae		Rhithrogena		Rhithrogena	Other_Ephemeroptera	0.01	2	0	0	0	1	0	0	0	0	0	0
Ephemeroptera	Heptageniidae		Rhithrogena	Rhithrogena_gratianopolitana	Rhithrogena_gratianopolitana	Other_Ephemeroptera	0	0	0	0	0.01	2	0.06	5	0	0	0	0
Ephemeroptera	Heptageniidae		Heptagenia	Heptagenia_sulphurea	Heptagenia_sulphurea	Other_Ephemeroptera	0	0	0.01	1	0.02	5	0.01	1	0.01	2	0.02	2
Ephemeroptera	Ephemeridae		Ephemera	Ephemera_danica	Ephemera_danica	Other_Ephemeroptera	0.01	1	0	0	0	0	0	0	0	0	0	0
Ephemeroptera	Ephemeridae		Ephemera	Ephemera_glaucops	Ephemera_glaucops	Other_Ephemeroptera	0	0	0	0	0	1	0	0	0	0	0	0
Ephemeroptera	Ephemerellidae		Serratella	Serratella_ignita	Serratella_ignita	Other_Ephemeroptera	0	0	0.01	1	0	0	0	0	0.01	3	0	0
Ephemeroptera	Oligoneuridae		Oligoneuriella	Oligoneuriella_rhenana	Oligoneuriella_rhenana	Other_Ephemeroptera	0	0	0	0	0	1	0	0	0	1	0	0
Ephemeroptera	Leptophlebiidae		Habroleptoides	Habroleptoides_confusa	Habroleptoides_confusa	Other_Ephemeroptera	0	0	0	0	0	0	0	0	0	0	0.01	1
Plecoptera	Perlidae		Perla	Perla_marginata	Perla_marginata	Plecoptera	0.01	1	0	0	0.01	3	0	0	0	1	0	0
Plecoptera	Perlidae		Dinocras	Dinocras_cephalotes	Dinocras_cephalotes	Plecoptera	0.03	5	0.01	1	0	0	0	0	0	0	0	0
Plecoptera	Perlodidae		Besdolus	Besdolus_ravizzarum	Besdolus_ravizzarum	Plecoptera	0	0	0	0	0	0	0.01	1	0	0	0	0
Plecoptera	Leuctridae		Leuctra		Leuctra	Plecoptera	0	0	0	0	0	1	0.04	3	0	0	0	0
Plecoptera	Leuctridae		Leuctra	Leuctra_leptogaster	Leuctra_leptogaster	Plecoptera	0	0	0	0	0	0	0.05	4	0	0	0	0
Plecoptera	Leuctridae		Leuctra	Leuctra_fusca	Leuctra_fusca	Plecoptera	0.01	1	0.06	4	0.02	5	0.01	1	0.02	8	0.11	9
Plecoptera	Leuctridae		Leuctra	leuctra_geniculata	leuctra_geniculata	Plecoptera	0.01	1	0	0	0	0	0	0	0	0	0	0
Plecoptera	Taeniopterygidae		Taeniopteryx	Taeniopteryx_schoenemundi	Taeniopteryx_schoenemundi	Plecoptera	0.05	8	0.13	9	0	0	0	0	0	0	0	0
Trichoptera	Hydropsychidae		Hydropsyche	Hydropsyche_botosaneanui	Hydropsyche_botosaneanui	Hydropsyche	0.04	6	0.1	7	0.01	3	0.01	1	0.01	3	0.05	4
Trichoptera	Hydropsychidae		Hydropsyche	Hydropsyche_exocellata	Hydropsyche_exocellata	Hydropsyche	0	0	0	0	0.01	2	0	0	0.02	5	0	0
Trichoptera	Hydropsychidae		Hydropsyche	Hydropsyche_incognita	Hydropsyche_incognita	Hydropsyche	0.03	4	0.15	10	0.01	3	0.04	3	0.01	3	0.04	3
Trichoptera	Hydropsychidae		Hydropsyche	Hydropsyche_instabilis	Hydropsyche_instabilis	Hydropsyche	0.01	2	0.04	3	0	0	0	0	0	0	0	0
Trichoptera	Hydropsychidae		Hydropsyche	Hydropsyche_modesta	Hydropsyche_modesta	Hydropsyche	0.05	7	0.13	9	0.12	28	0.2	16	0.02	5	0.01	1
Trichoptera	Hydropsychidae		Hydropsyche	Hydropsyche_pellucidula	Hydropsyche_pellucidula	Hydropsyche	0.01	2	0.01	1	0	0	0	0	0	0	0	0
Trichoptera	Hydroptilidae		Hydroptila	Hydroptila_vectis	Hydroptila_vectis	Other_Trichoptera	0	0	0	0	0	1	0	0	0	0	0	0
Trichoptera	Hydroptilidae		Hydroptila	Hydroptila_angulata	Hydroptila_angulata	Other_Trichoptera	0	0	0	0	0	1	0	0	0	0	0	0
Trichoptera	Psychomyiidae		Psychomyia		Psychomyia	Other_Trichoptera	0	0	0	0	0	0	0	0	0	1	0	0
Trichoptera	Psychomyiidae		Psychomyia	Psychomyia_pusilla	Psychomyia_pusilla	Other_Trichoptera	0	0	0	0	0	1	0	0	0.02	8	0	0
Trichoptera	Rhyacophilidae		Rhyacophila	Rhyacophila_nubila	Rhyacophila_nubila	Other_Trichoptera	0	0	0	0	0	0	0	0	0	1	0	0
Trichoptera	Rhyacophilidae		Rhyacophila	Rhyacophila_meridionalis	Rhyacophila_meridionalis	Other_Trichoptera	0.02	3	0.01	1	0	1	0	0	0.04	14	0.01	1
Trichoptera	Glossosomatidae		Agapetus	Agapetus_cravensis	Agapetus_cravensis	Other_Trichoptera	0	0	0	0	0	0	0	0	0	1	0	0
Hemiptera	Aphididae		Therioaphis	Therioaphis_riehmi	Therioaphis_riehmi	Rare_prey	0	0	0	0	0	1	0	0	0	0	0	0
Lepidoptera					Lepidoptera	Rare_prey	0	0	0	0	0	0	0	0	0	1	0	0
Coleoptera	Elmidae		Limnius	Limnius_volckmari	Limnius_volckmari	Coleoptera	0.01	1	0	0	0	0	0	0	0	0	0	0
Coleoptera	Hydraenidae		Hydraena	Hydraena_gracilidelphis	Hydraena_gracilidelphis	Coleoptera	0	0	0.01	1	0	0	0	0	0	0	0	0
Amphipoda	Gammaridae		Gammarus	Gammarus_fossarum	Gammarus_fossarum	Gammaridae	0.01	2	0.01	1	0	1	0.01	1	0.01	2	0	0
Amphipoda	Gammaridae		Gammarus	Gammarus_pulex	Gammarus_pulex	Gammaridae	0.04	6	0.04	3	0.01	3	0.01	1	0.09	29	0.06	5
Cypriniformes	Nemacheilidae		Barbatula		Barbatula	Fish	0.01	1	0	0	0	0	0	0	0.01	2	0	0
Cypriniformes	Cyprinidae		Gobio	Gobio_gobio	Gobio_gobio	Fish	0	0	0	0	0	0	0	0	0	1	0	0
